# Supplementary material for: Akkermansia muciniphila prevents cold-related atrial fibrillation in rats by modulation of TMAO induced cardiac pyroptosis
Source: PubMed Central journal article supplement — eBioMedicine. 2022 Jul 4;82:104087. doi: 10.1016/j.ebiom.2022.104087 (PMC9270211; doi:10.1016/j.ebiom.2022.104087), 2022-07-04

Original picture of western blot

Figure 1E

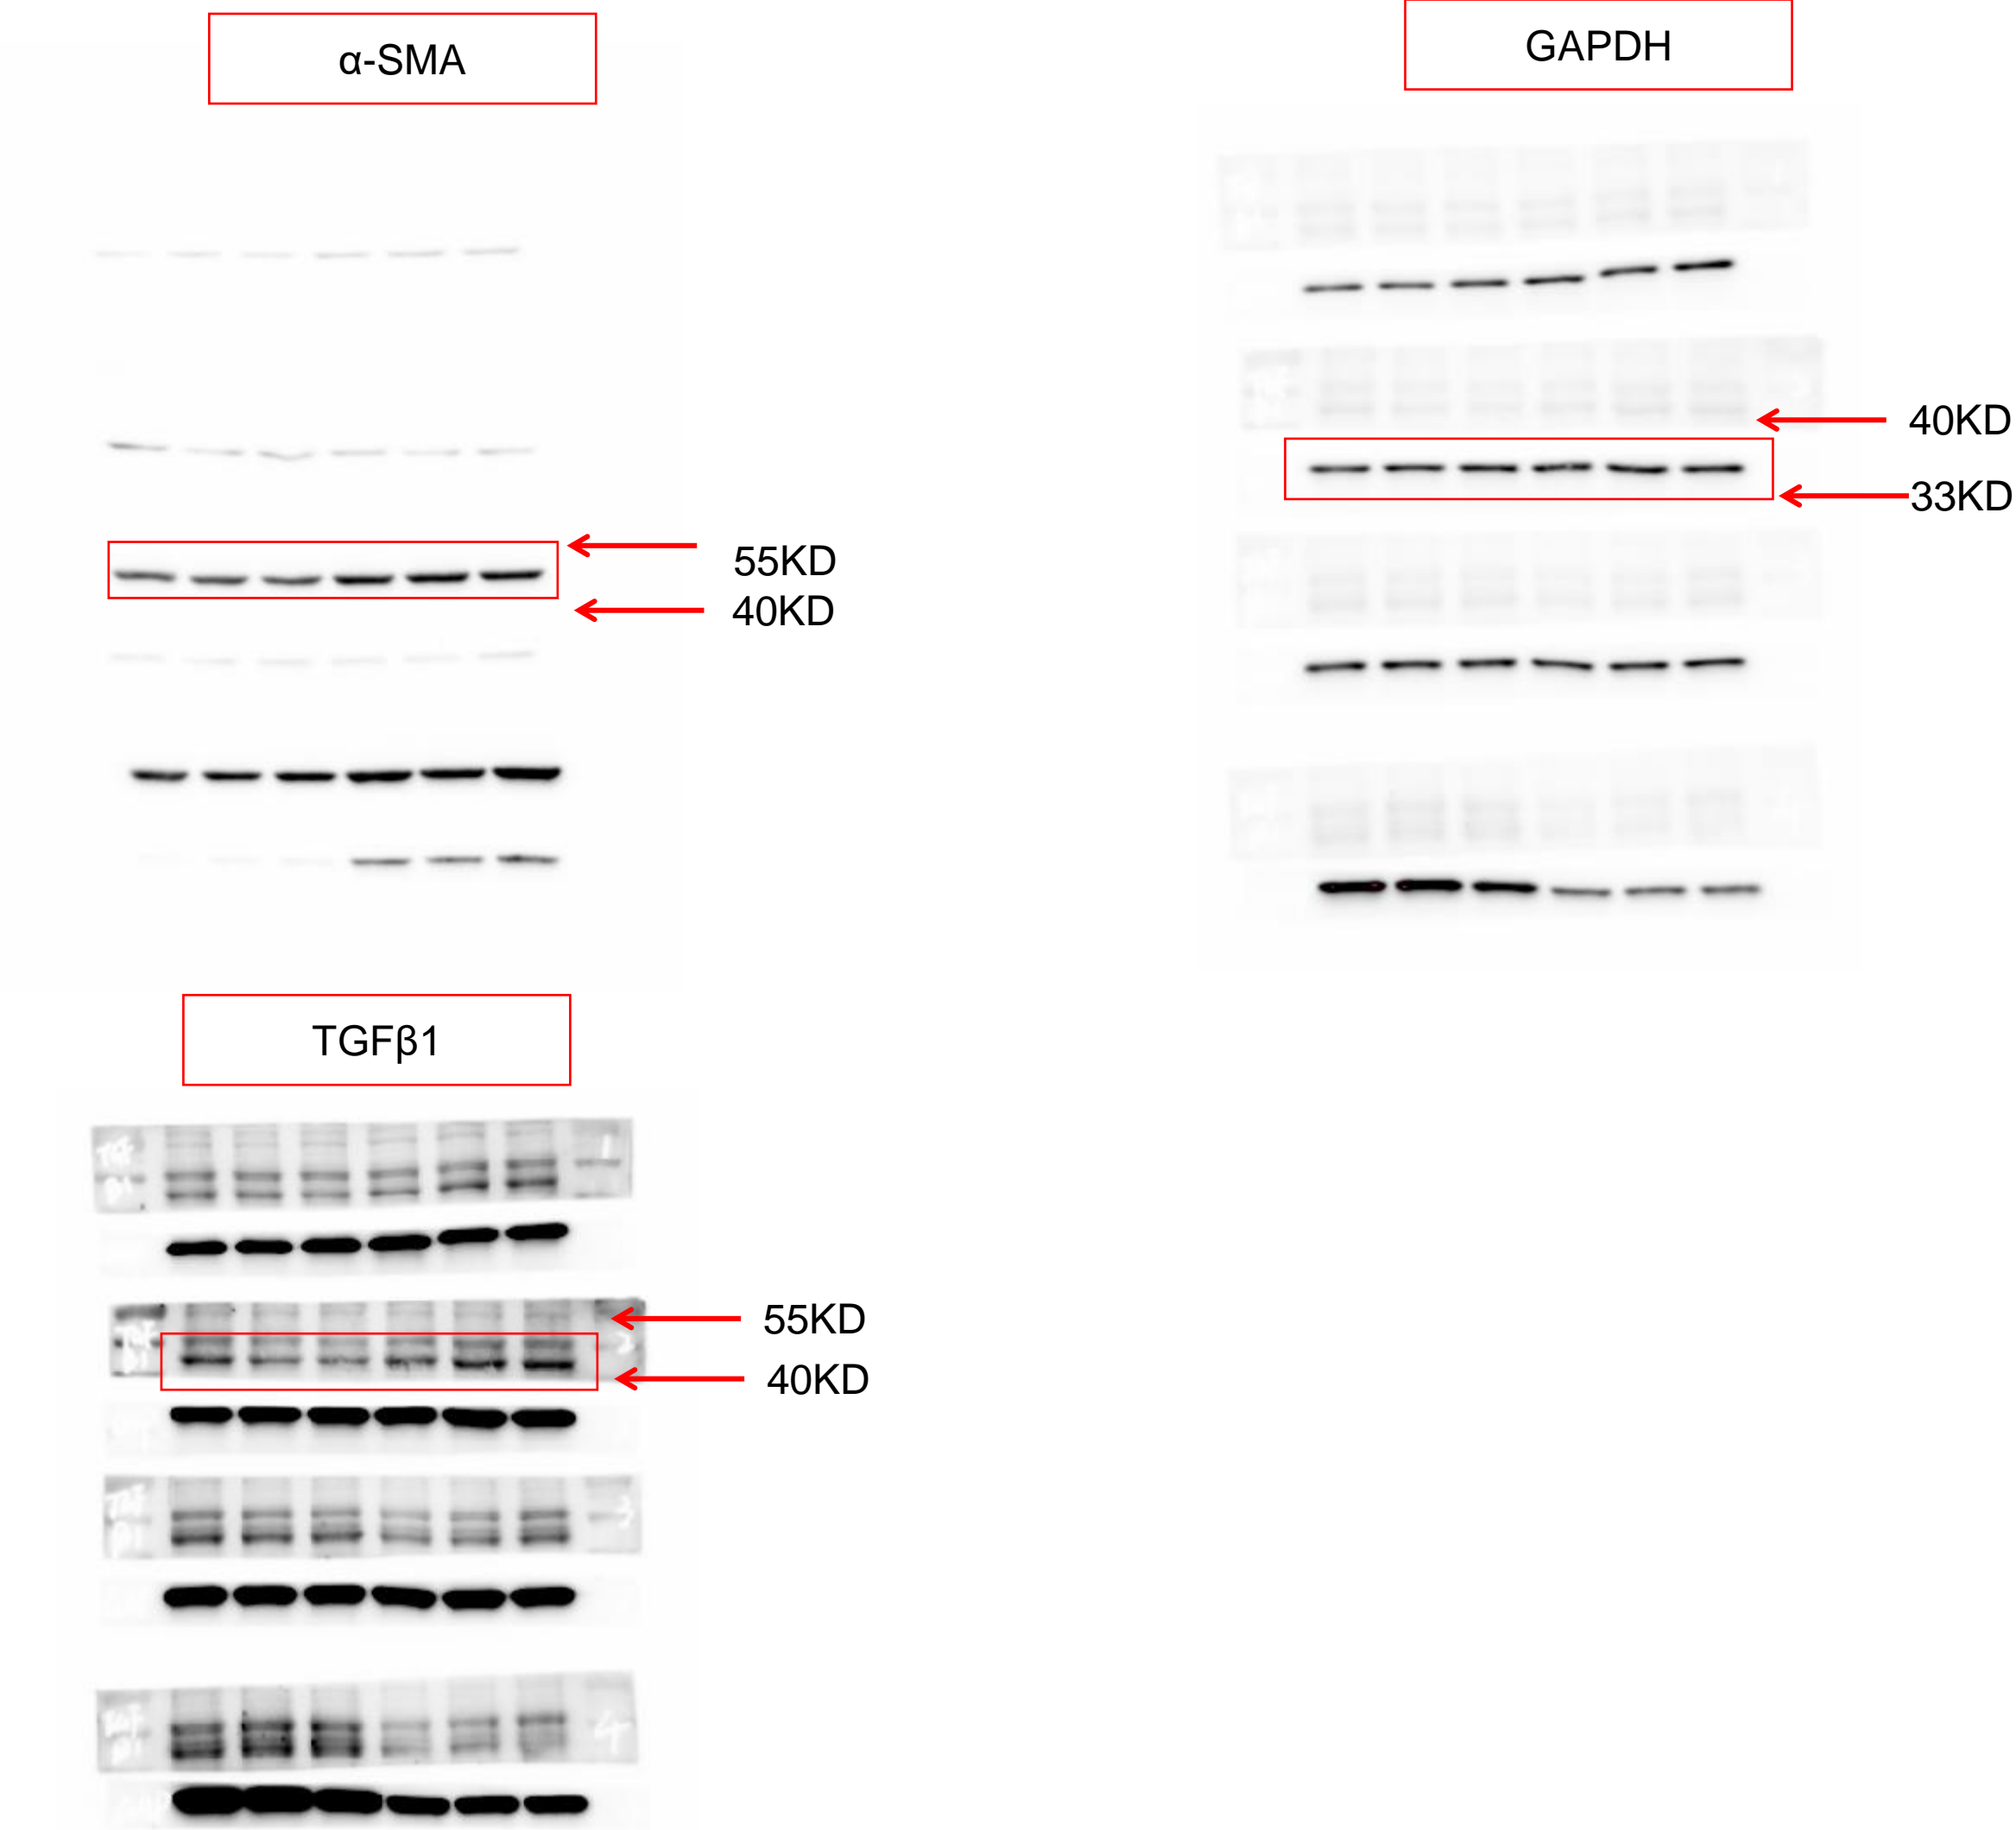

Figure 2E

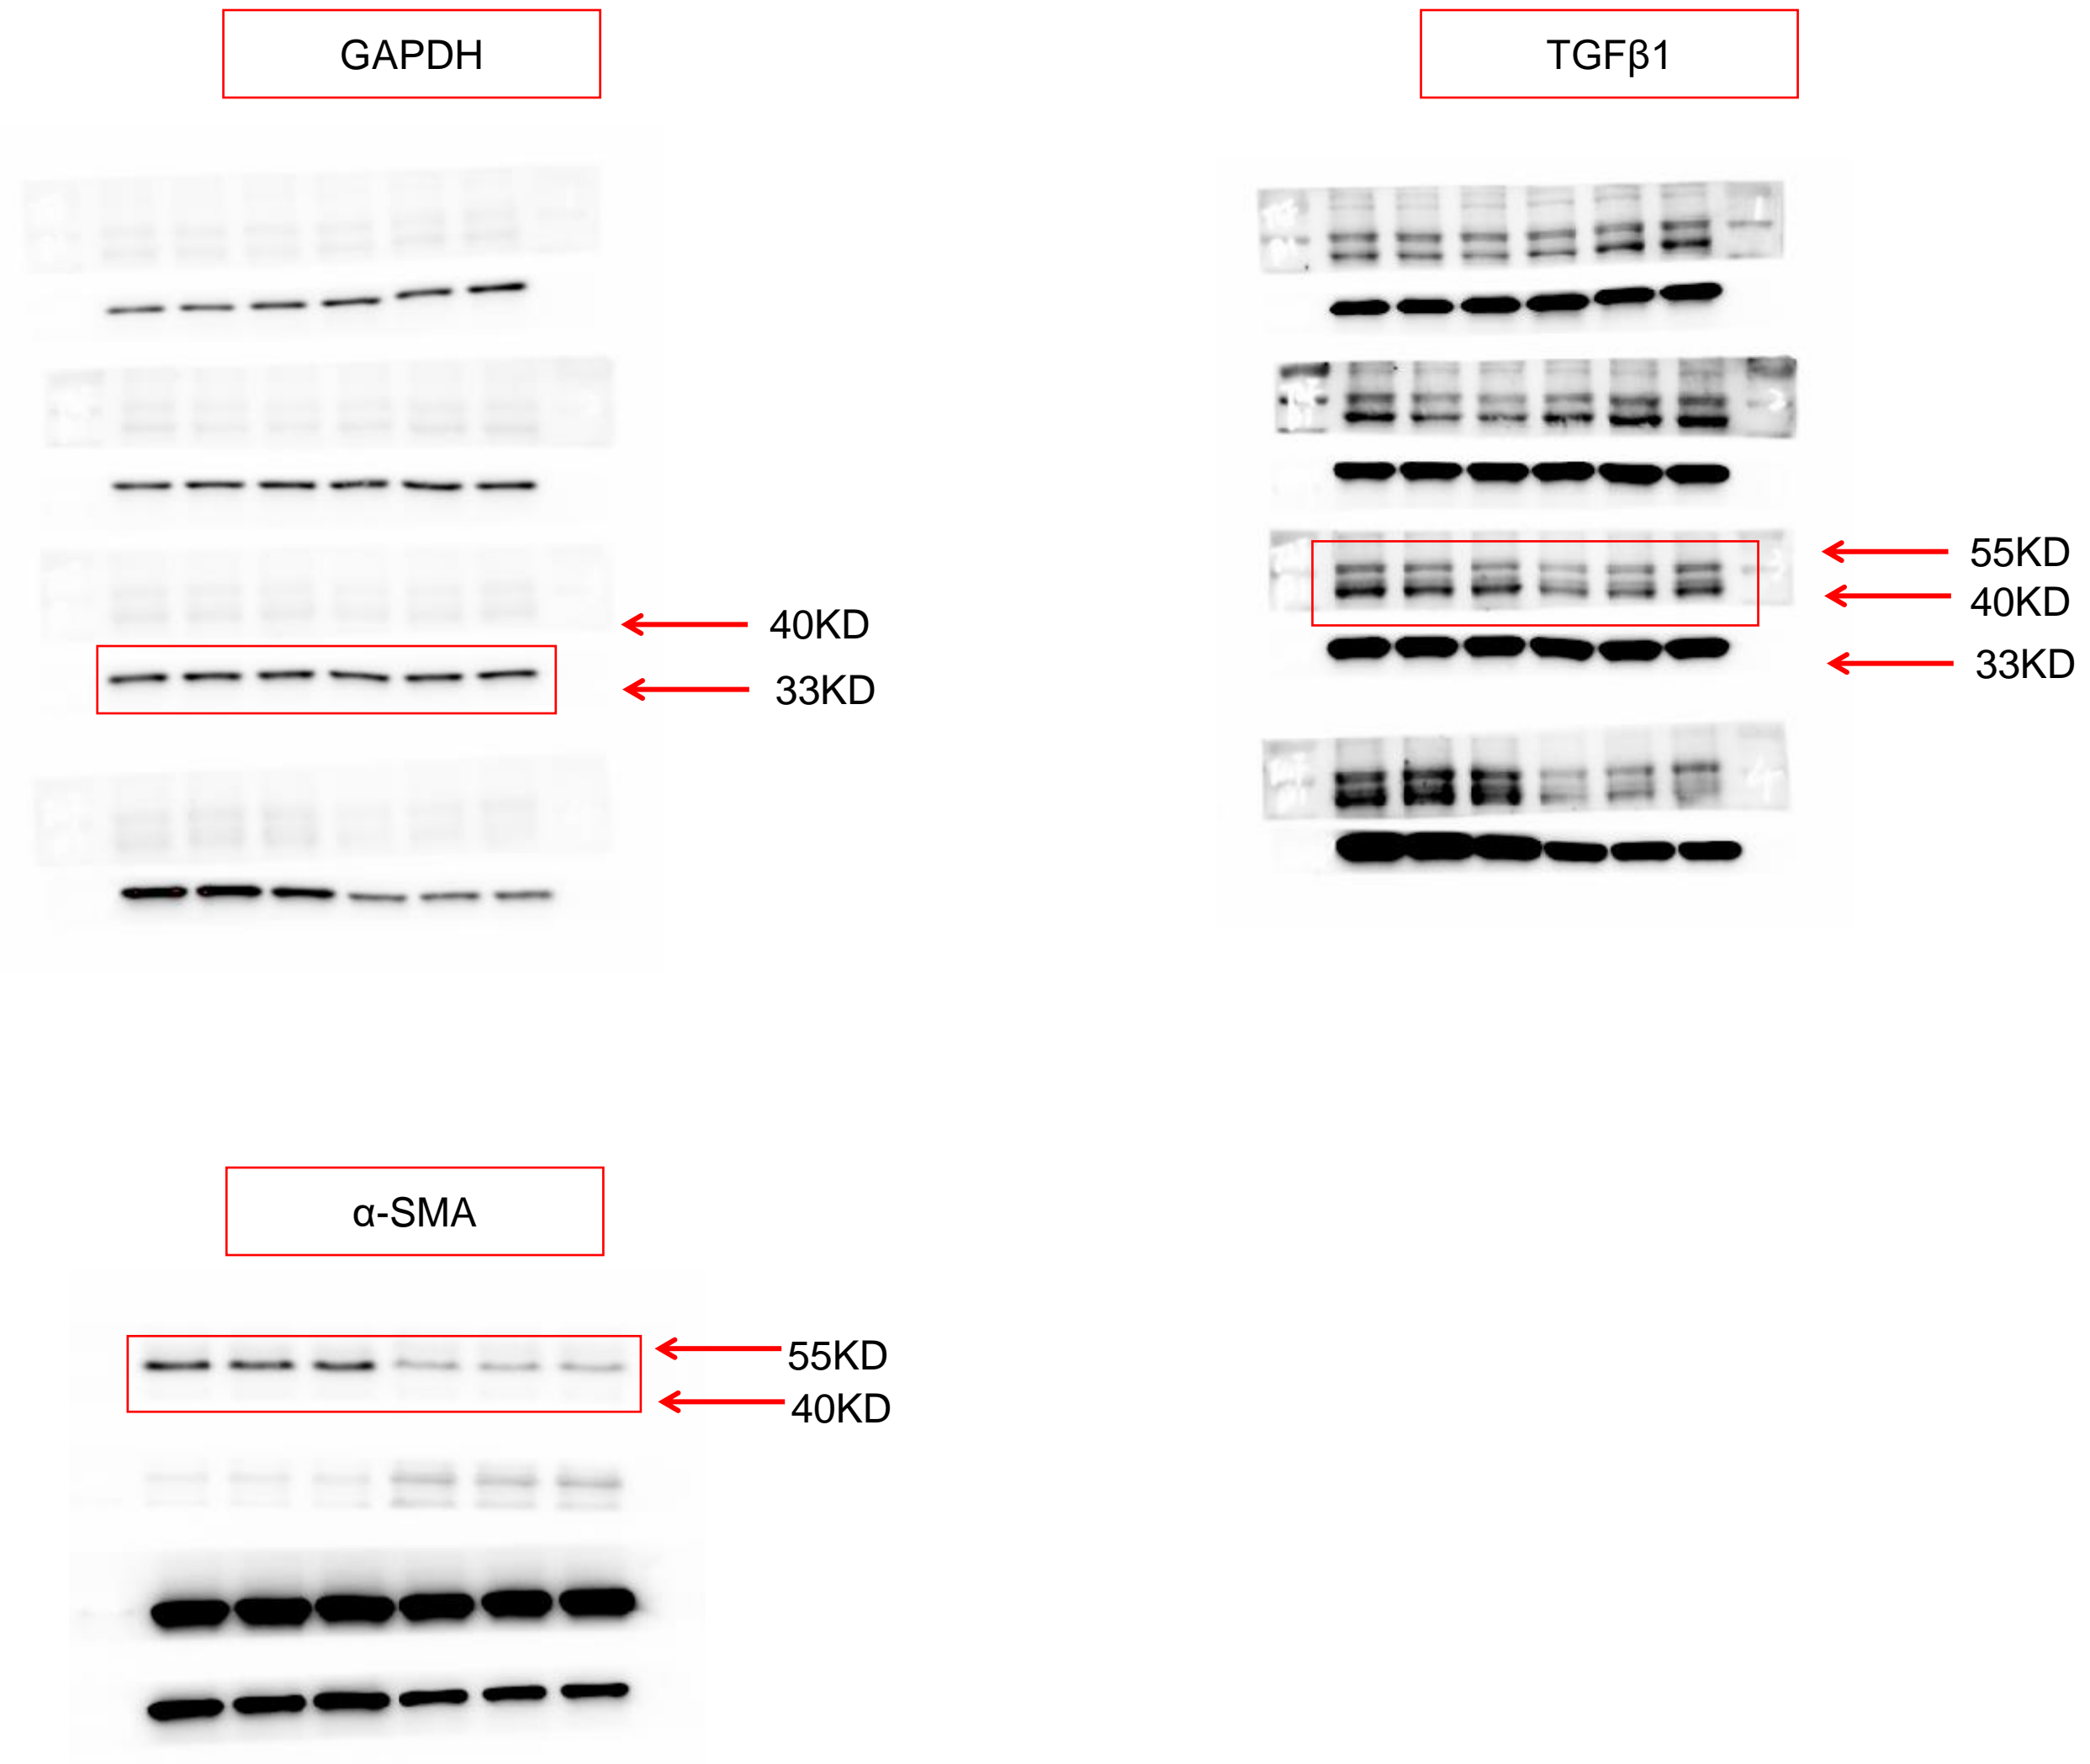

Figure 4D (Macrophages)

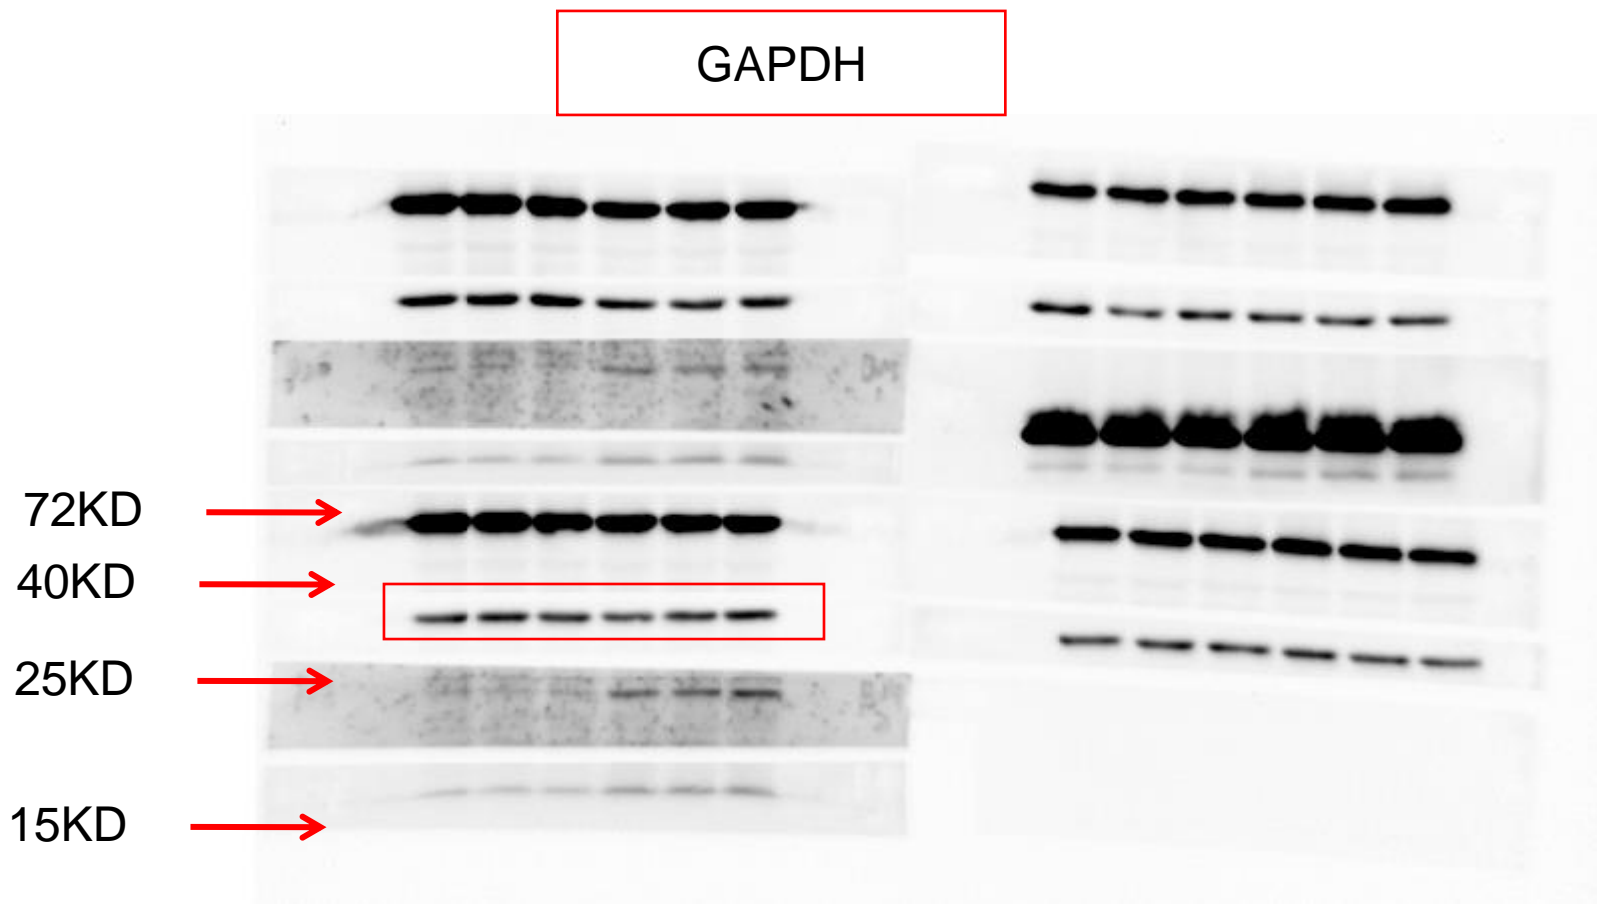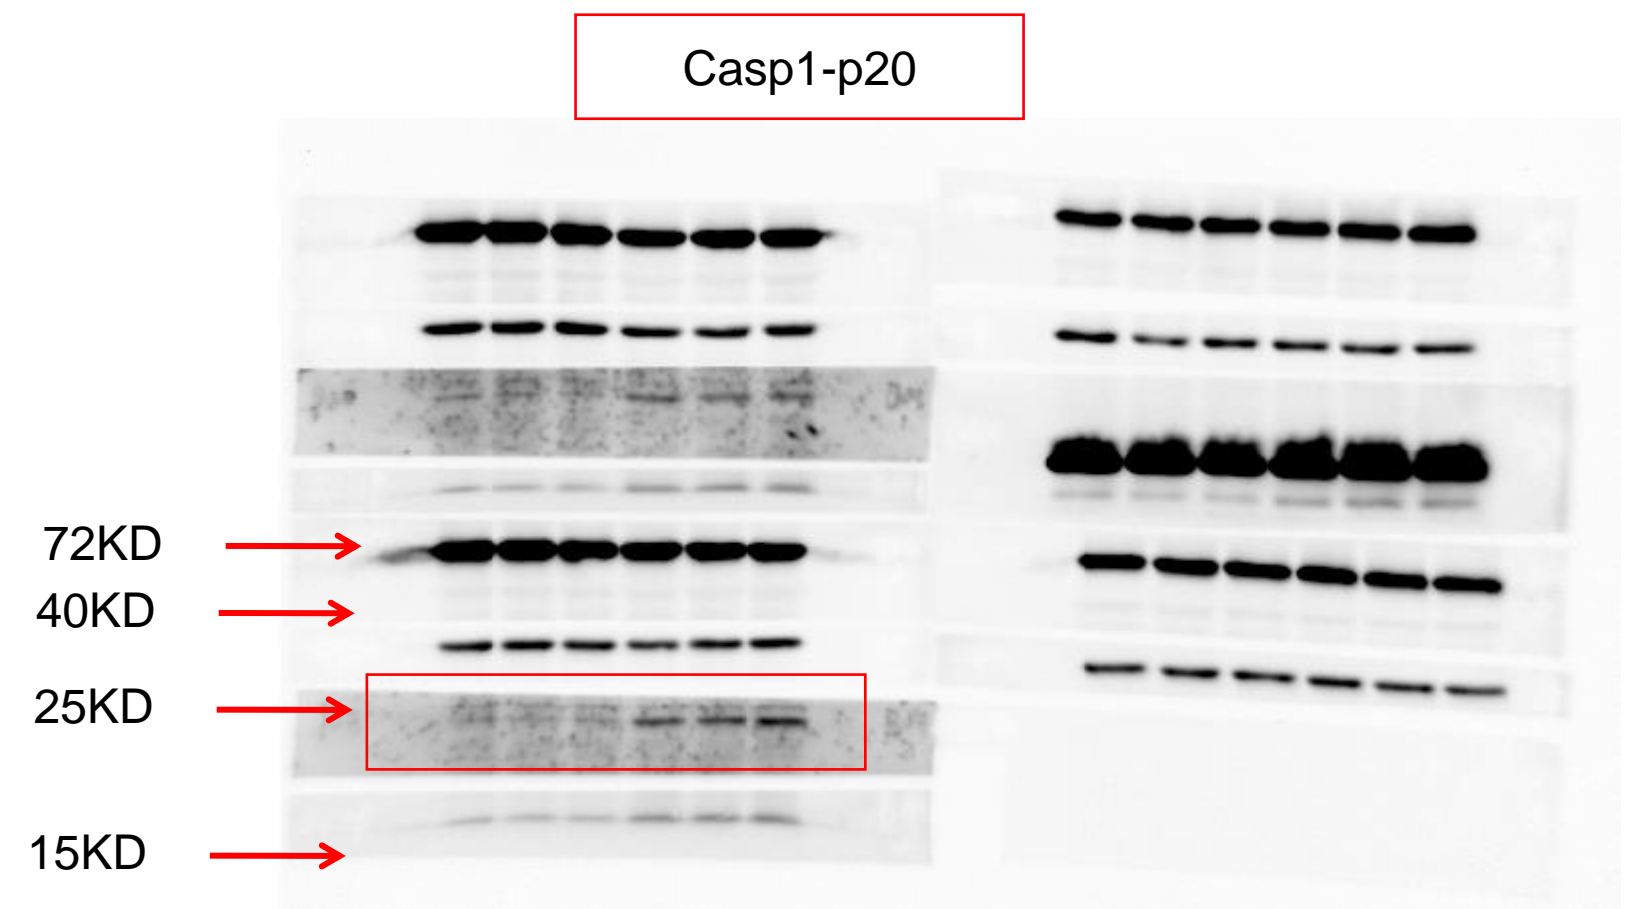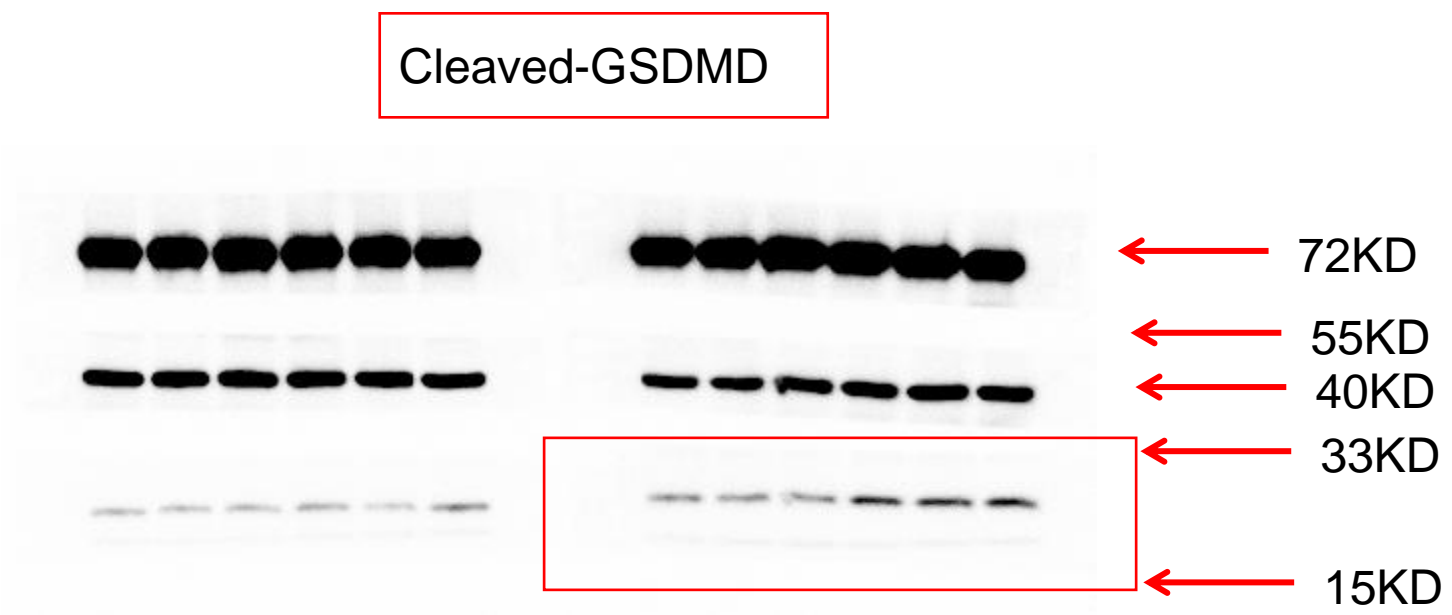

Figure 4E(Cardiac myocytes)

GAPDH

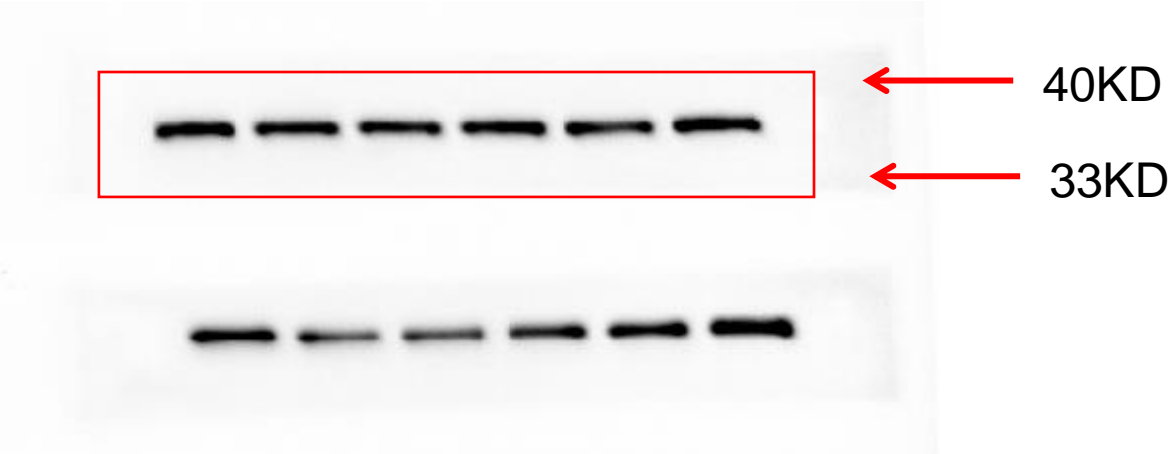

Cleaved-GSDMD

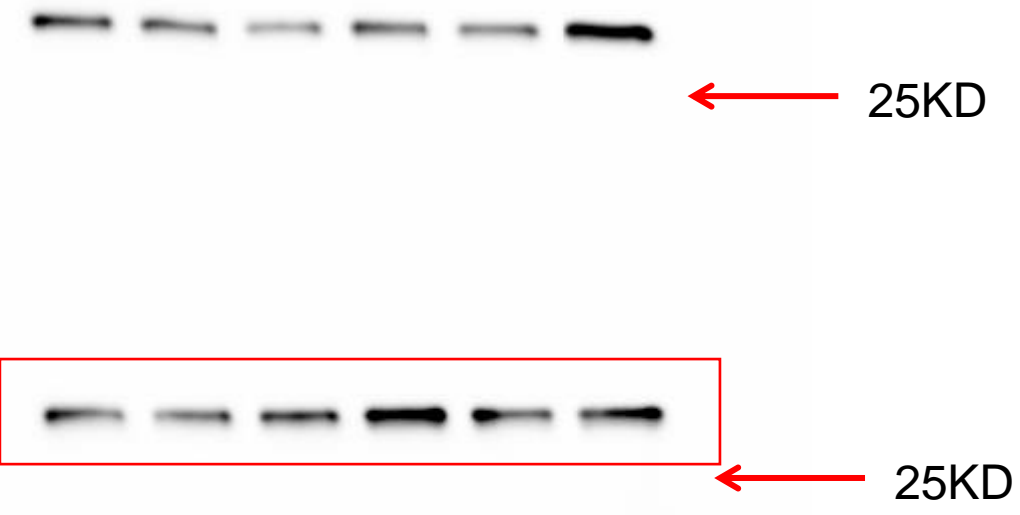

Casp1-p20

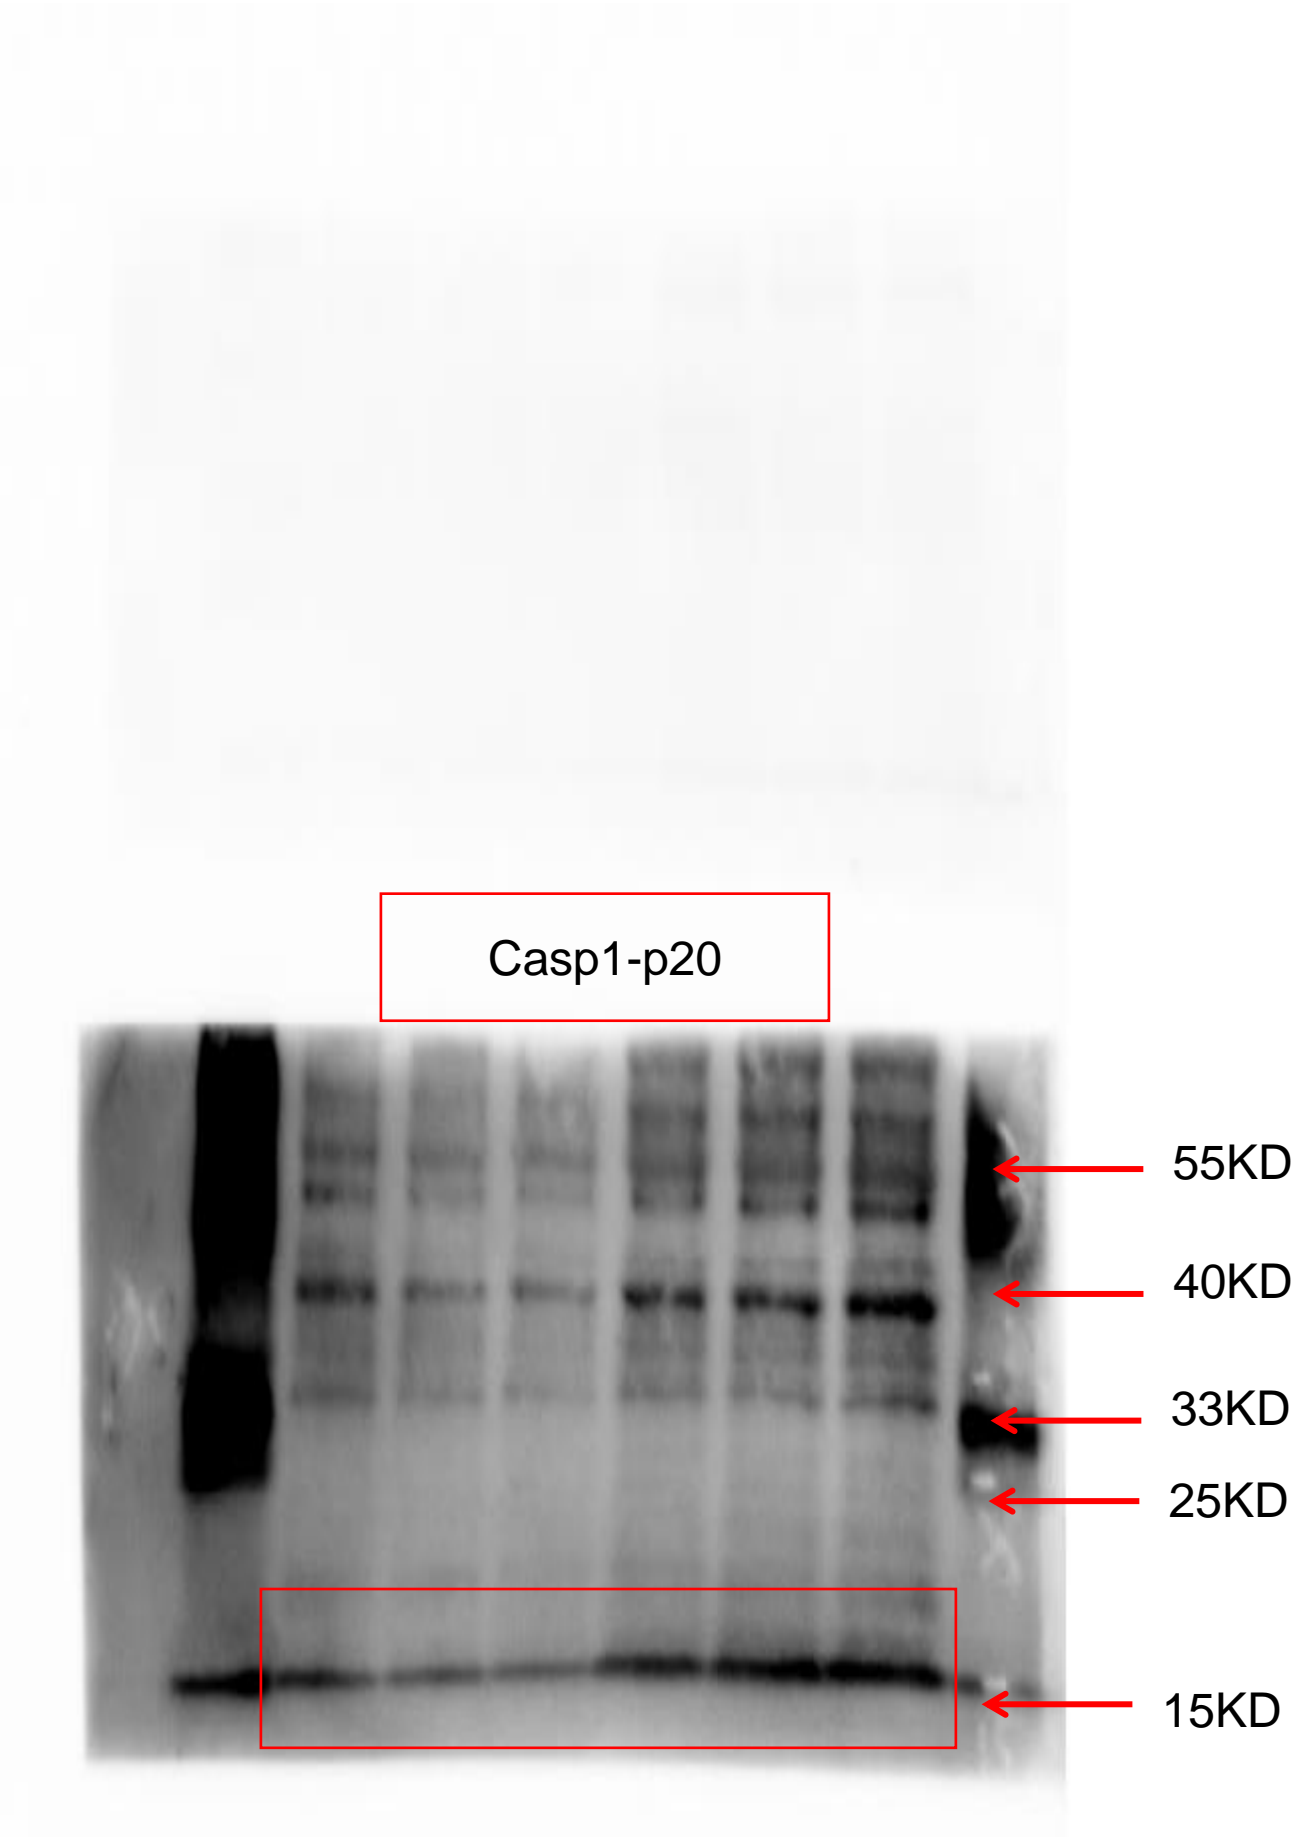

Figure 4E(Cardiac fibroblasts)

Cleaved-GSDMD

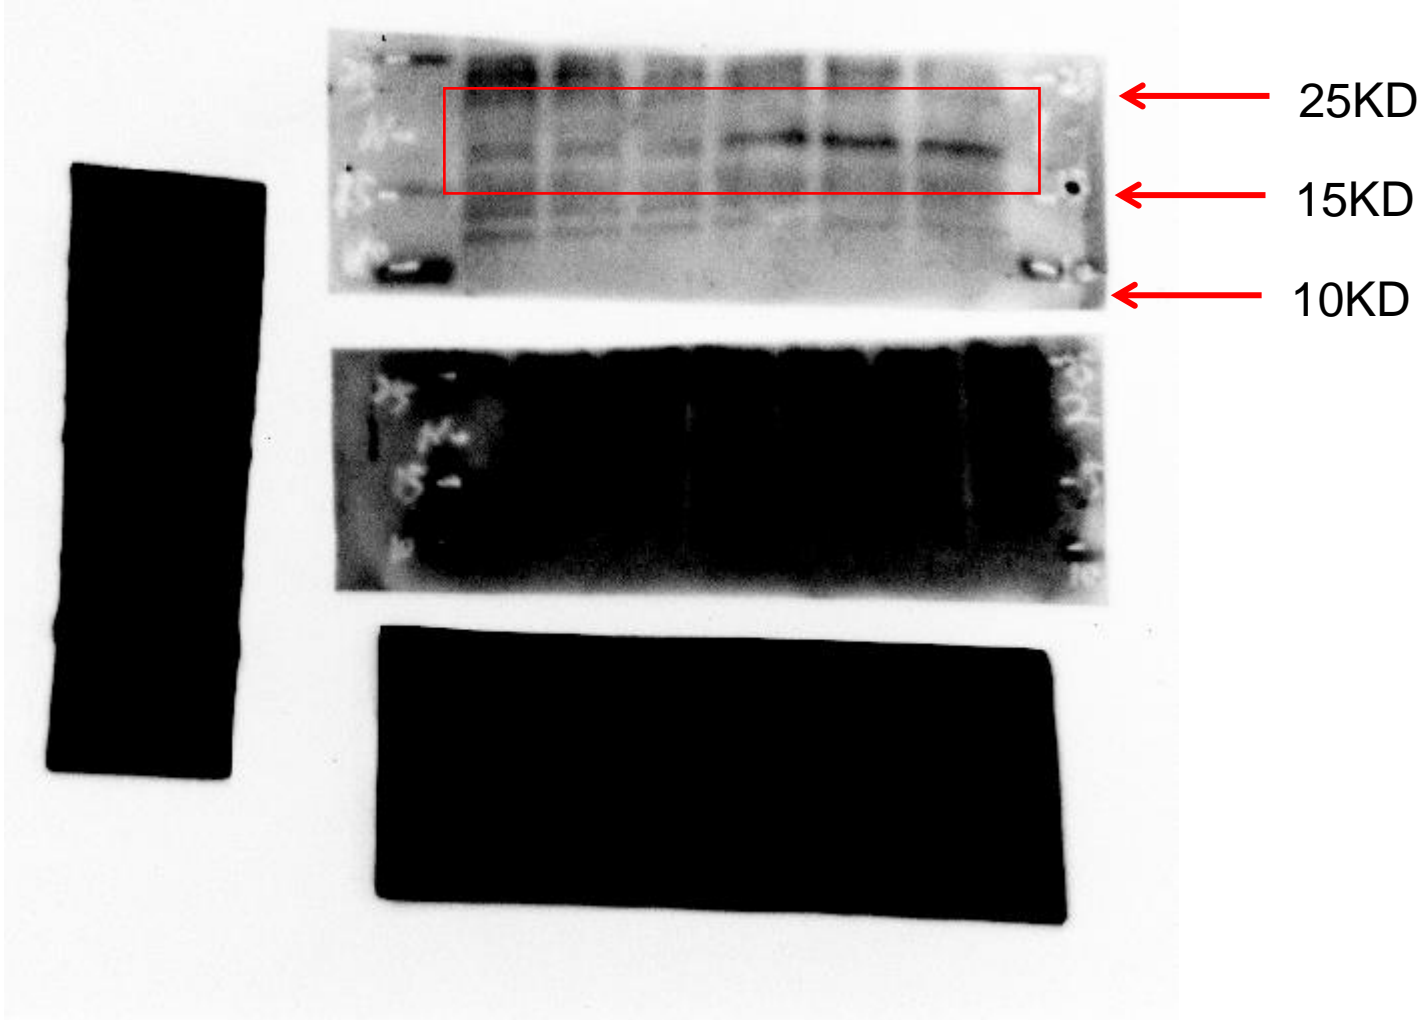

Casp1-p20

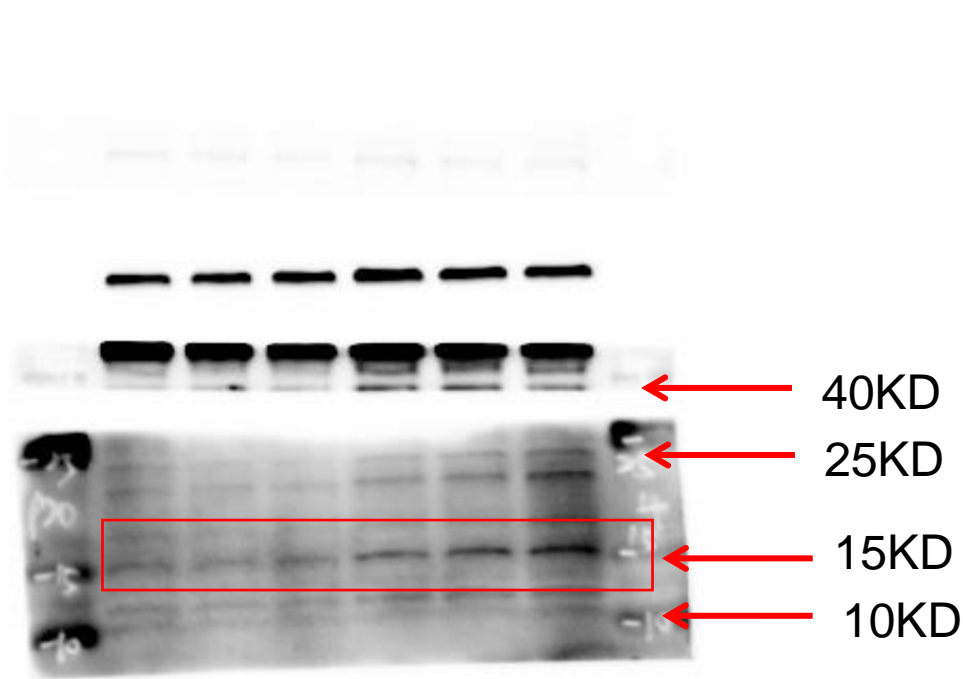

GAPDH

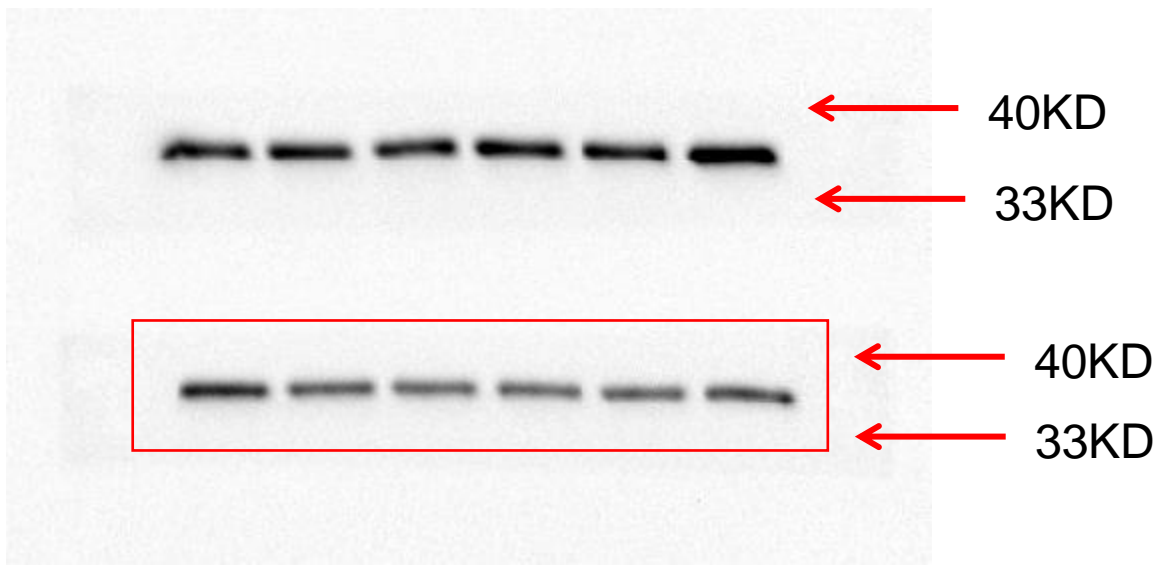

Figure 5D

Casp1-p20

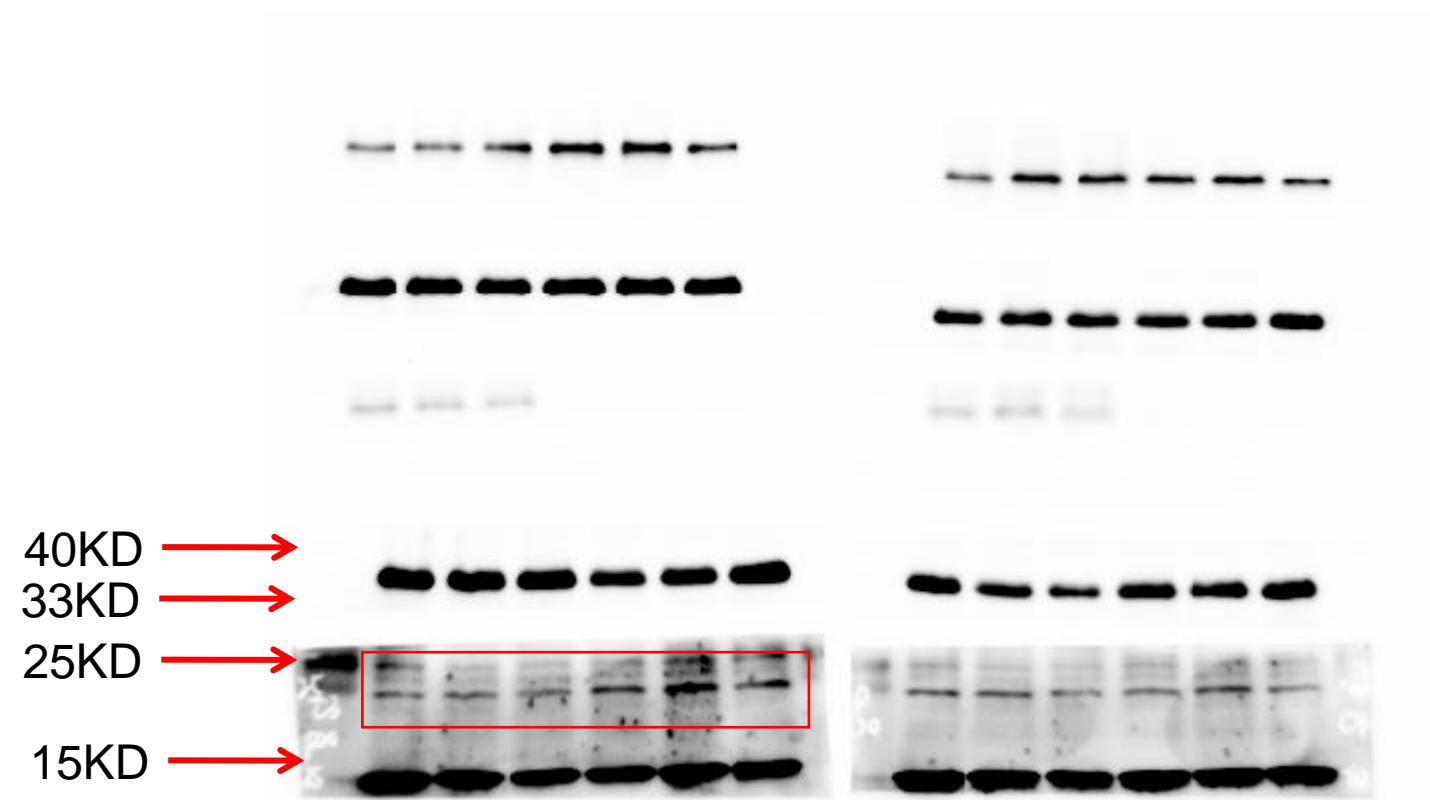

GAPDH

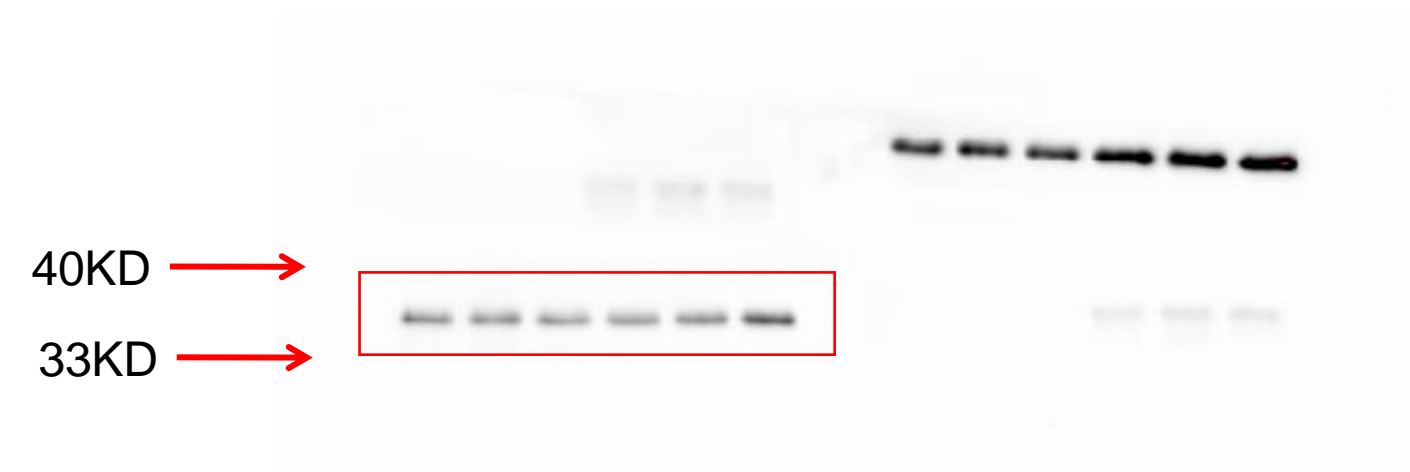

Cleaved-GSDMD

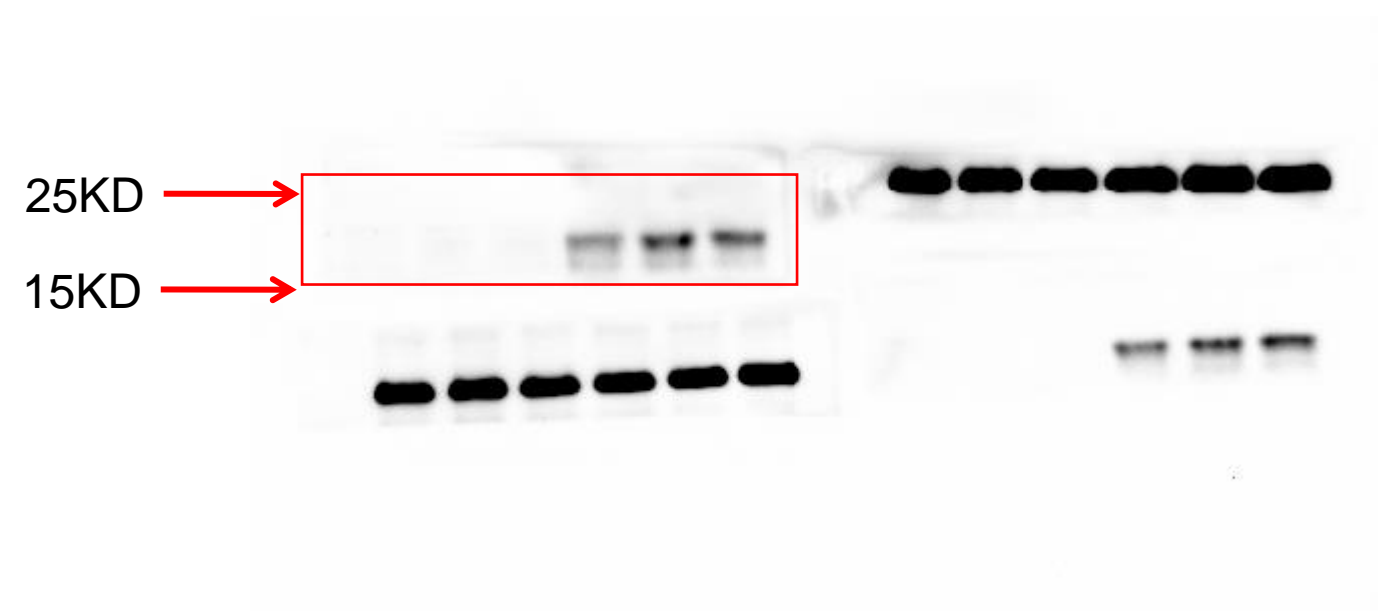

Figure 5E

Cleaved-GSDMD

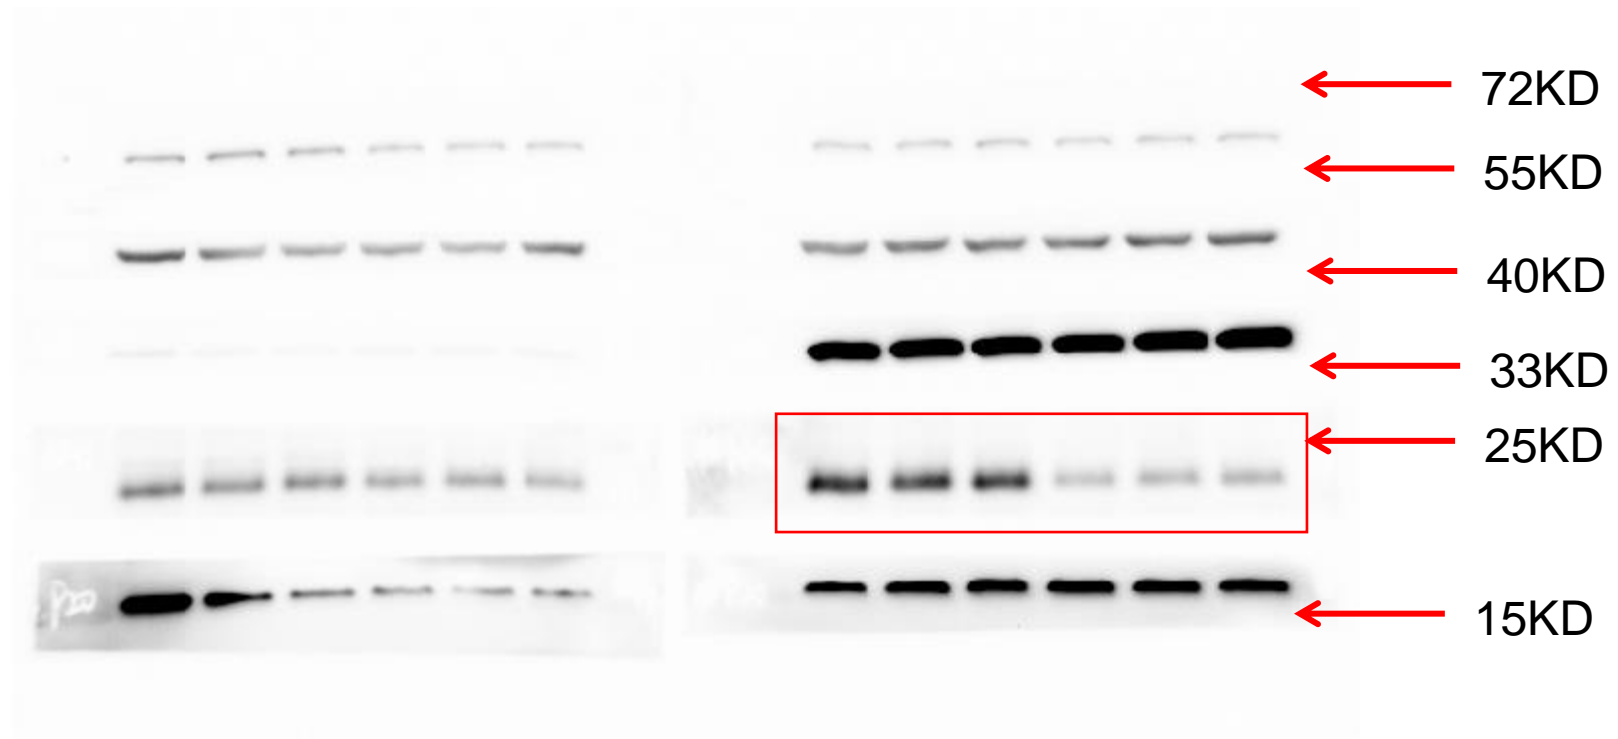

Casp1-p20

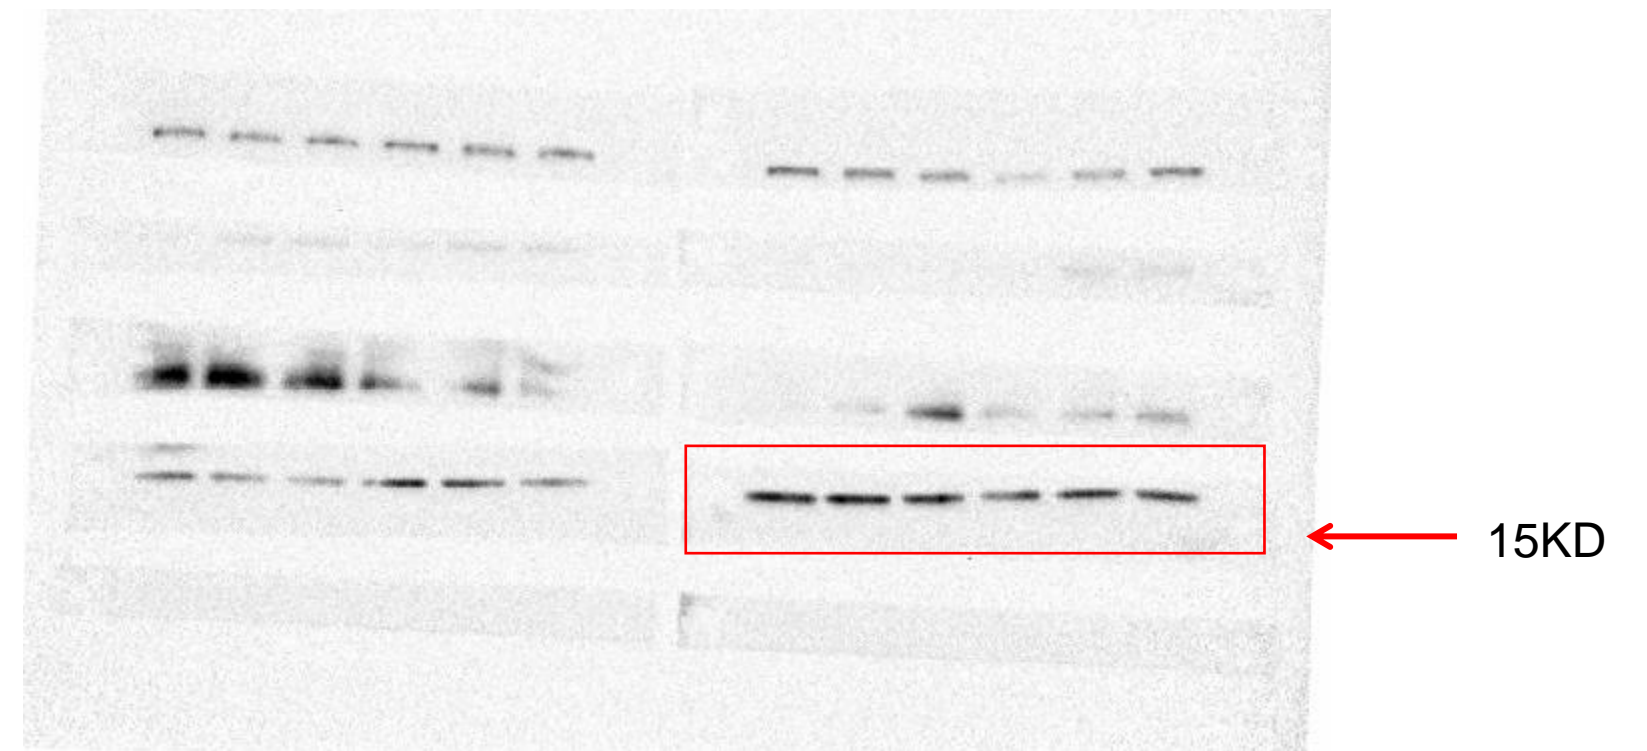

GAPDH

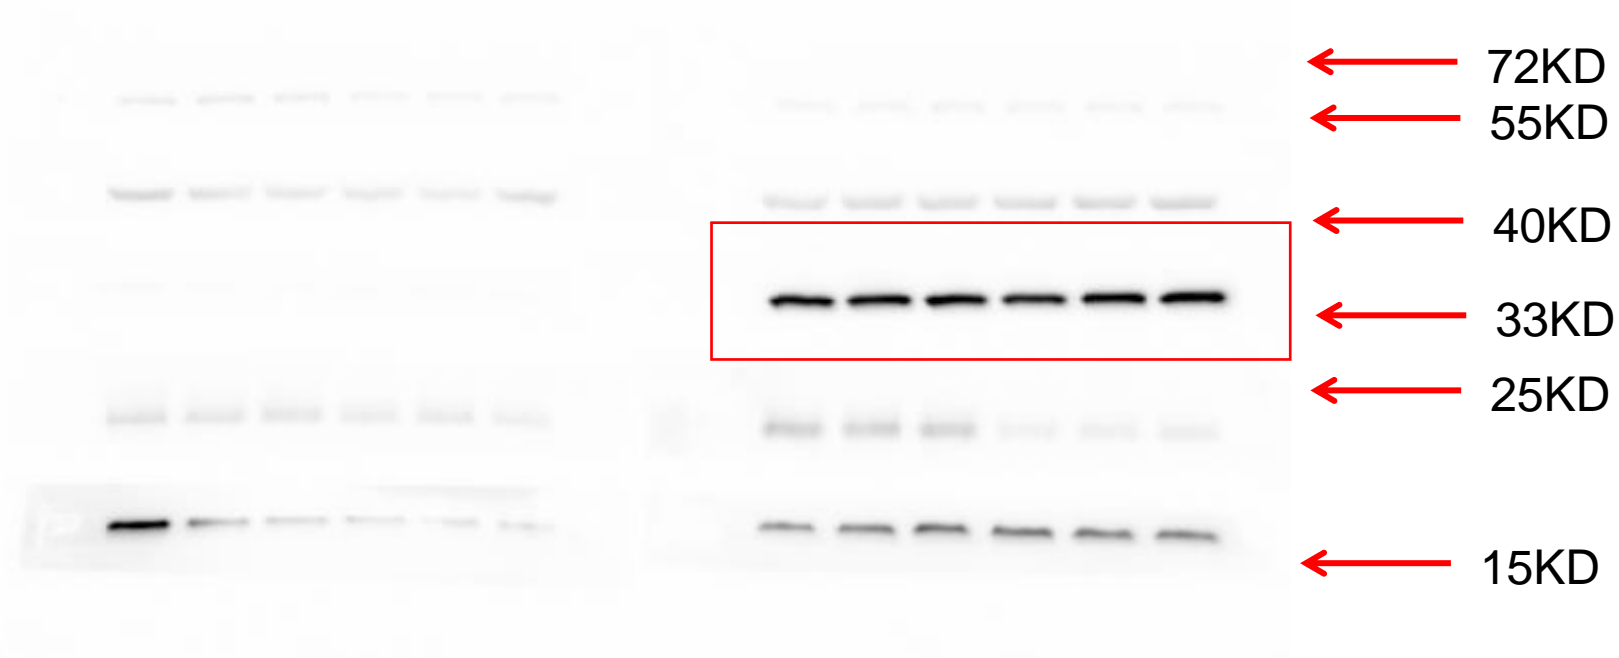

Figure 6C

Casp1-p20

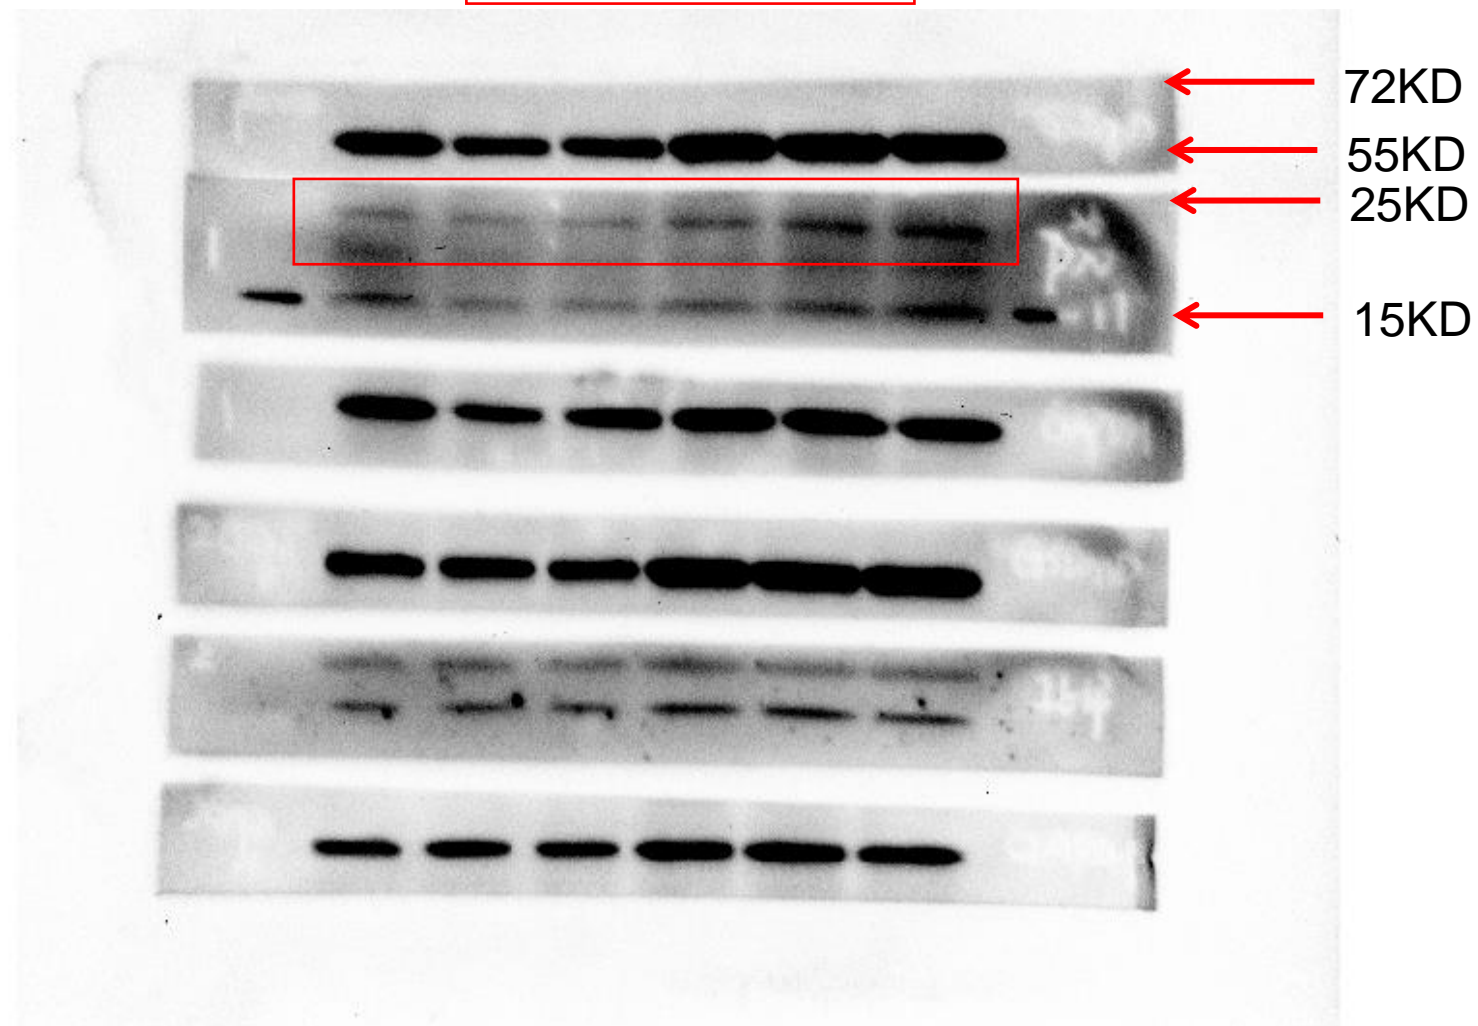

GAPDH

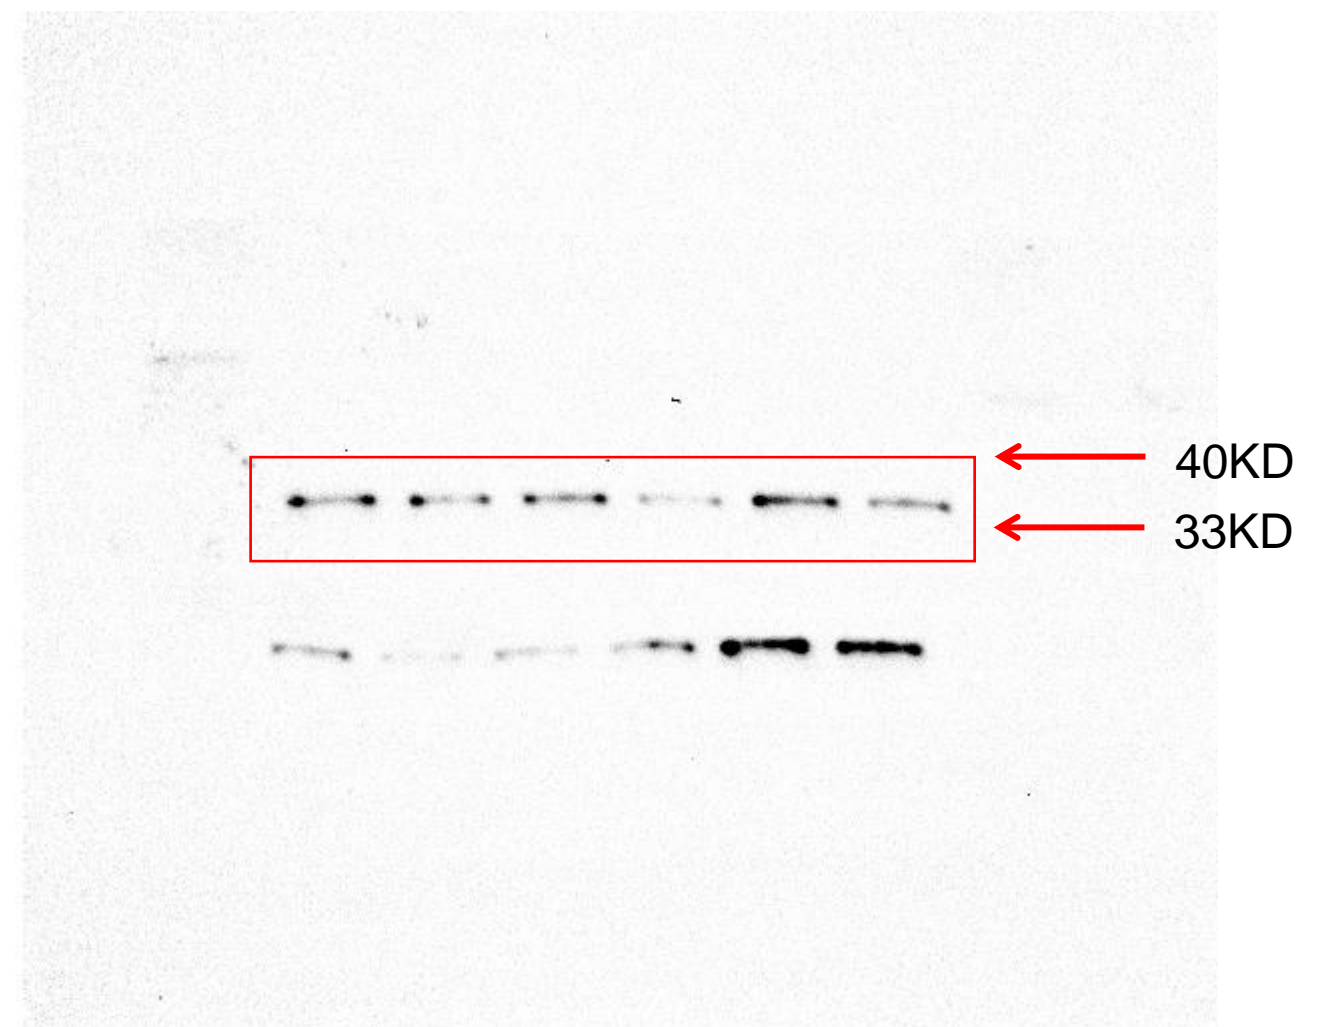

Cleaved-GSDMD

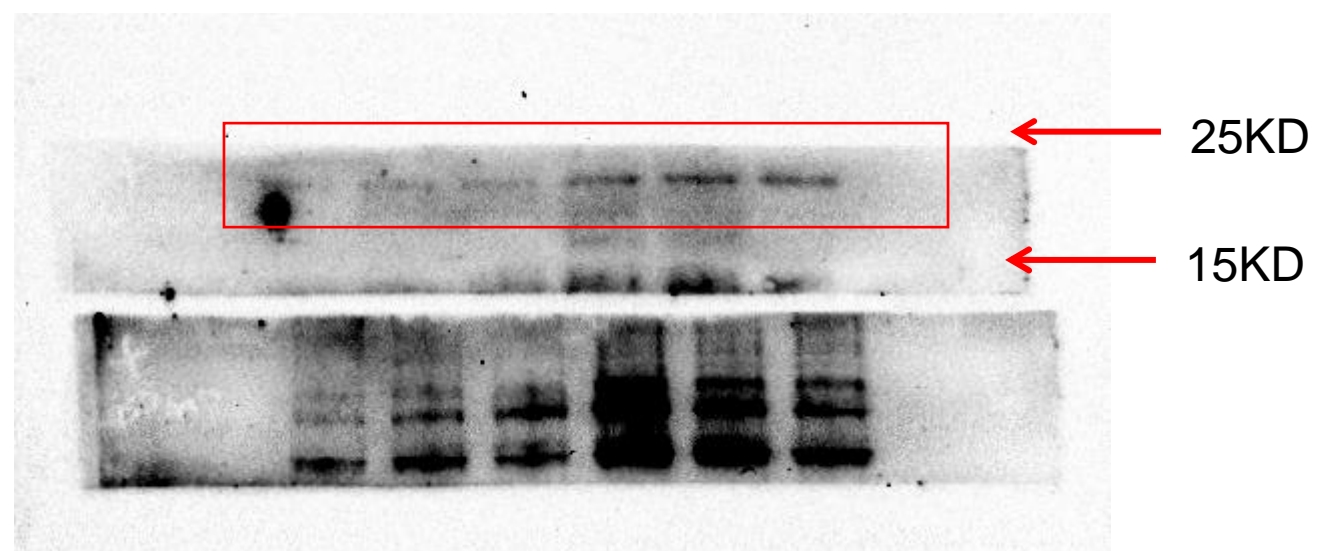



Figure 6G

Cleaved-GSDMD

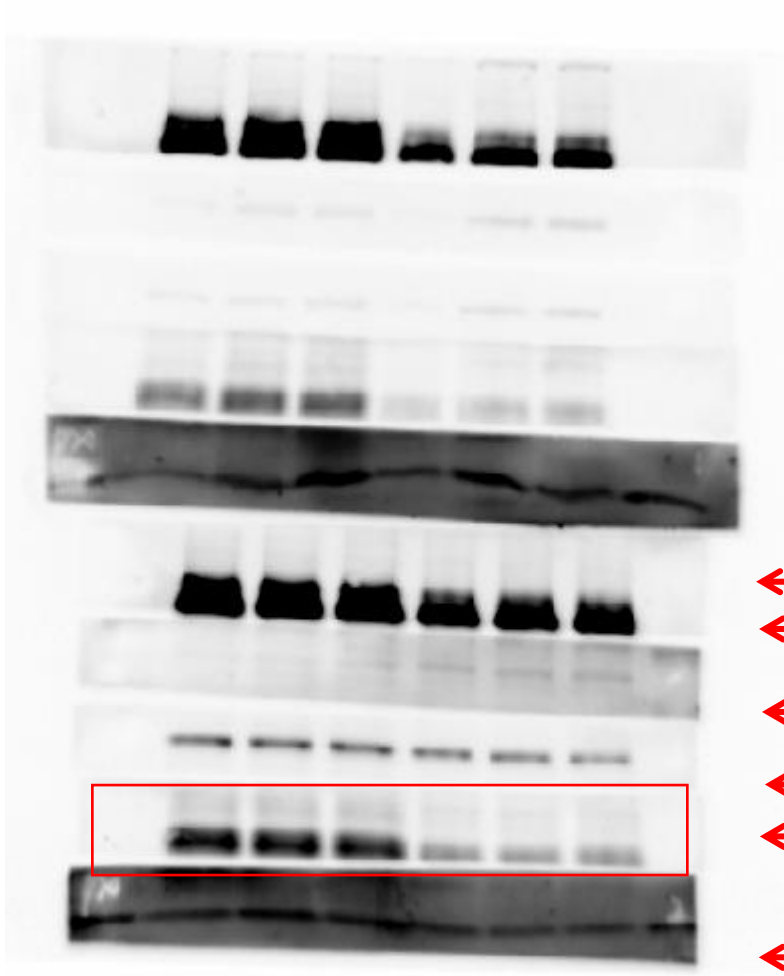

GAPDH

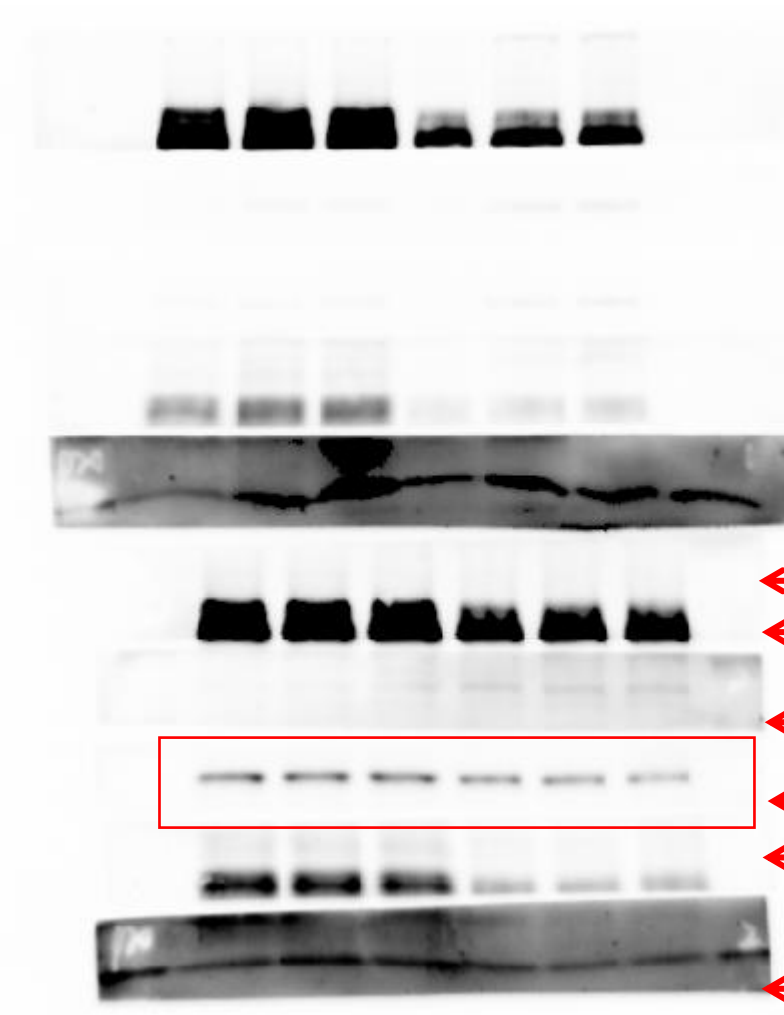

Casp1-p20

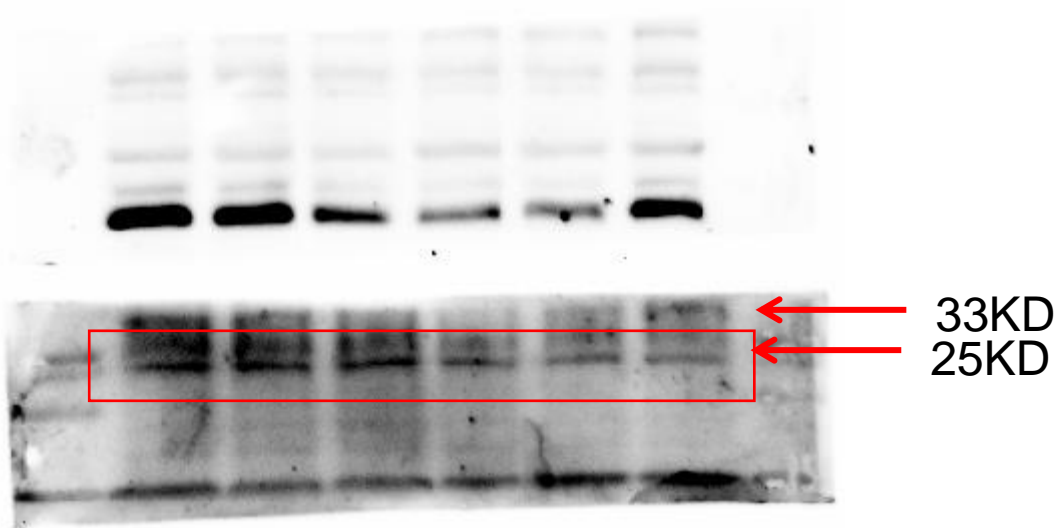

Figure 6H

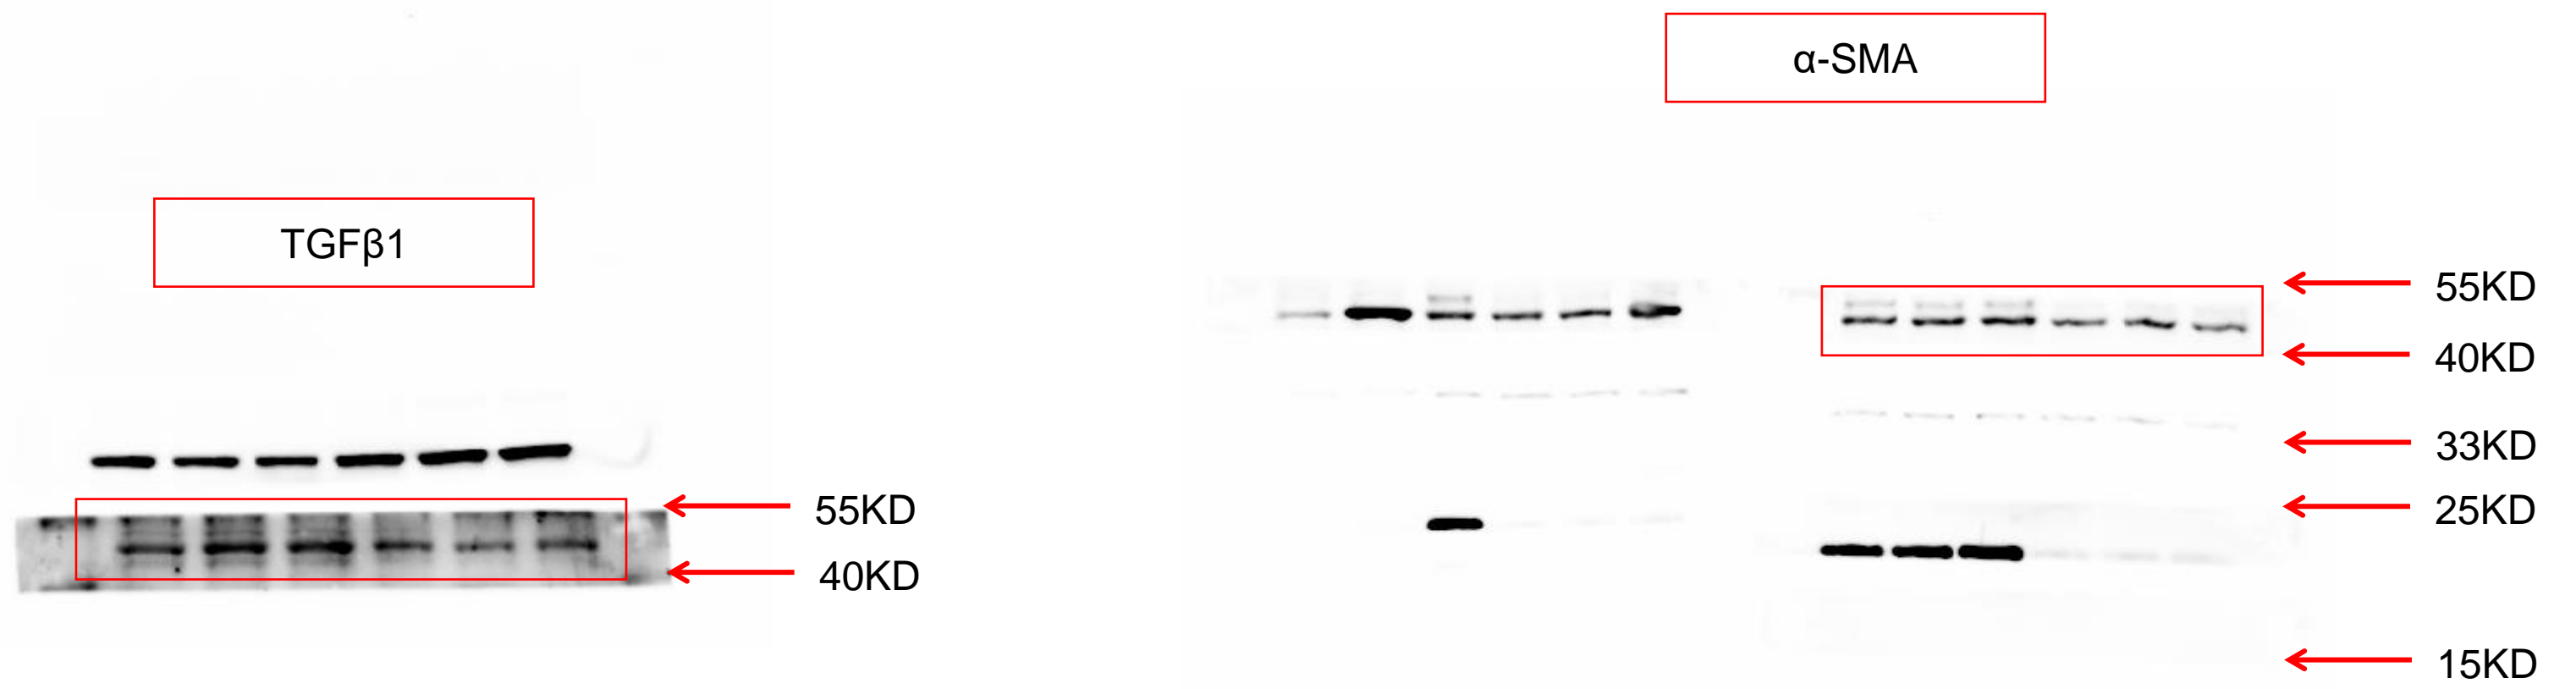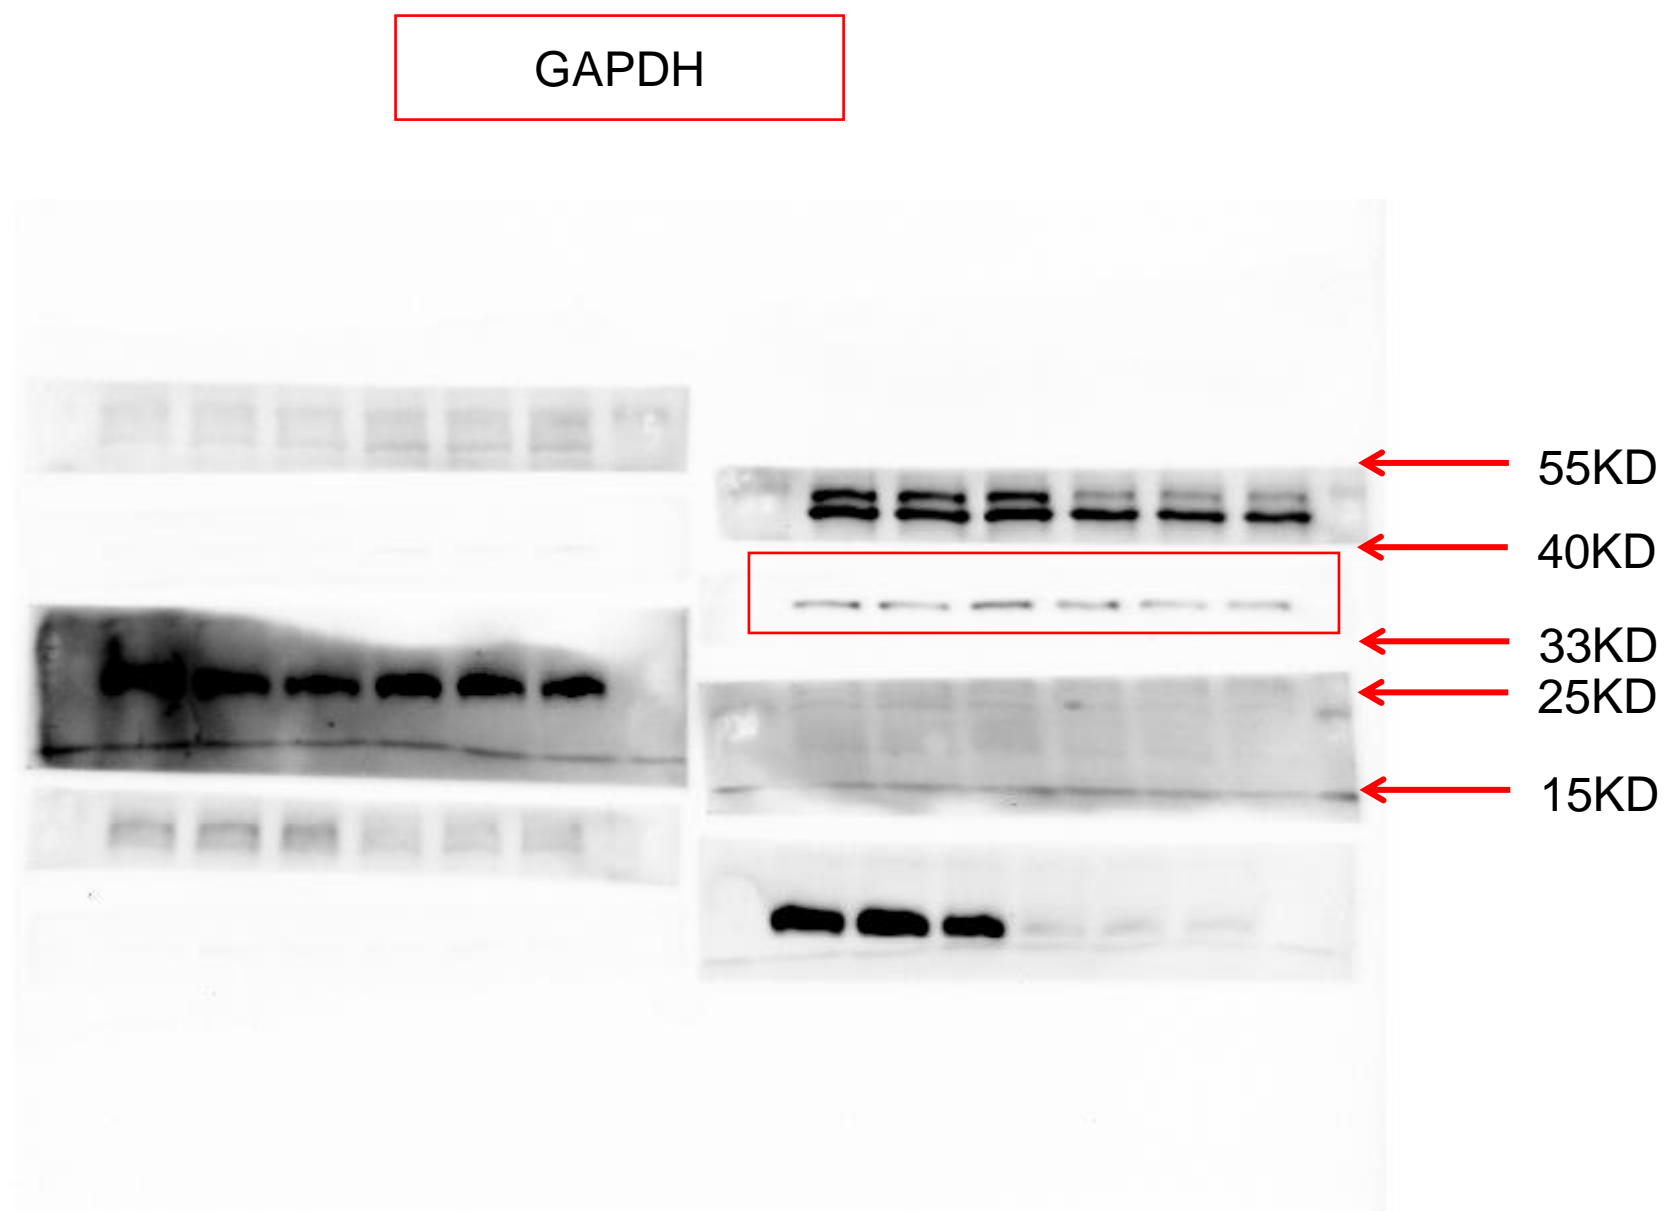

# Supplement Figure 2D

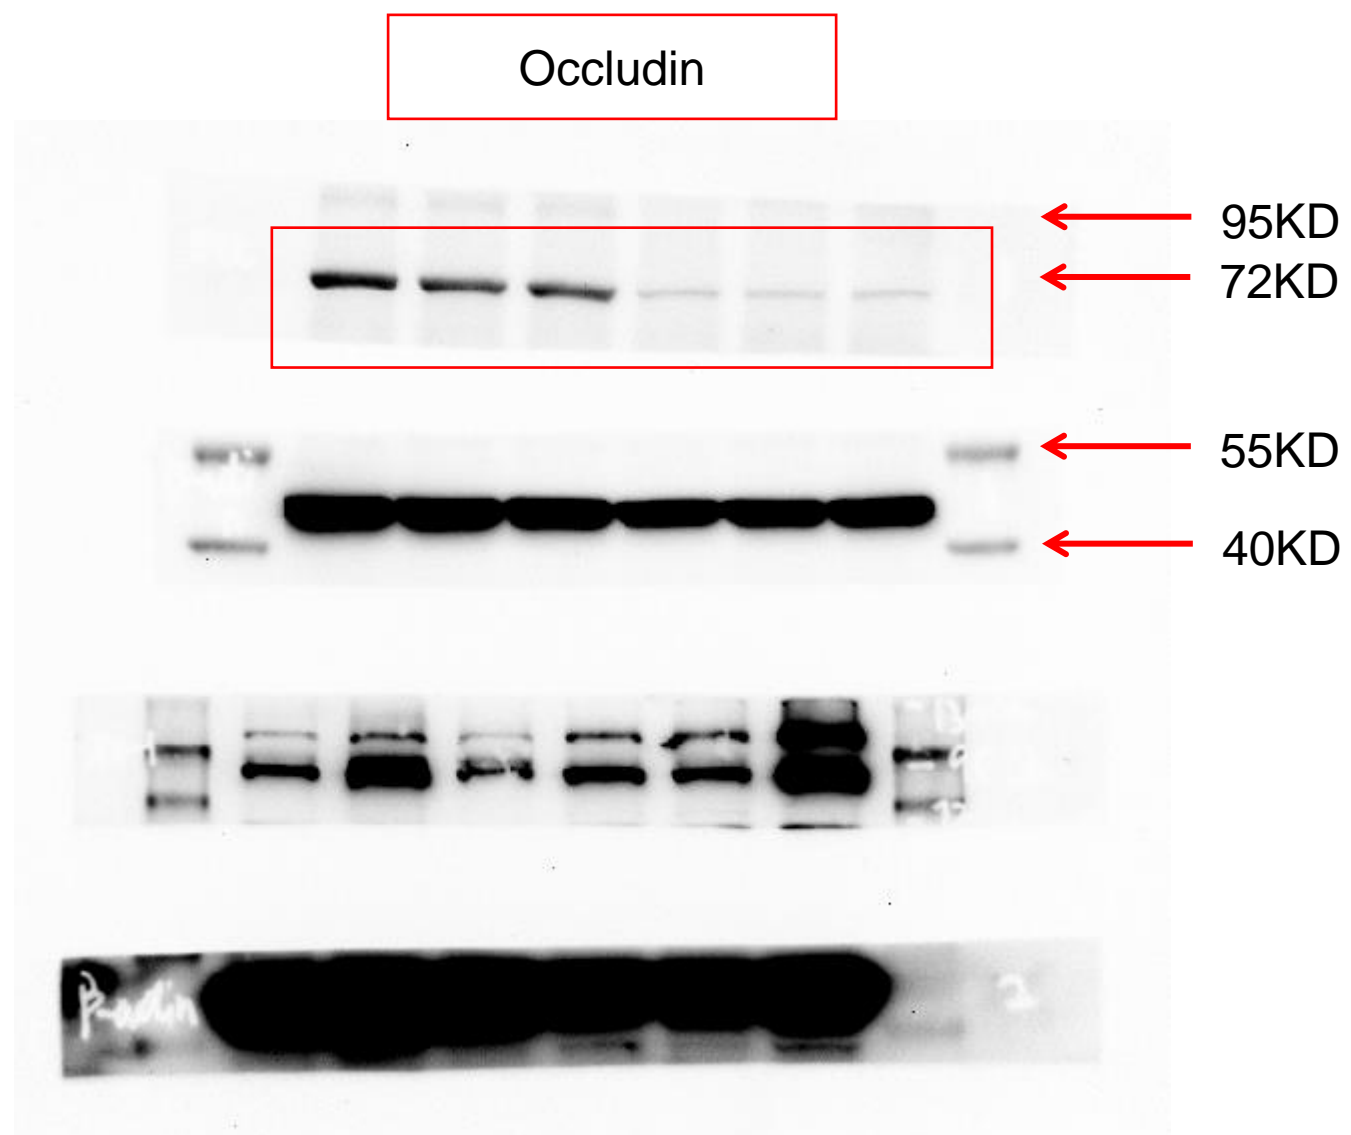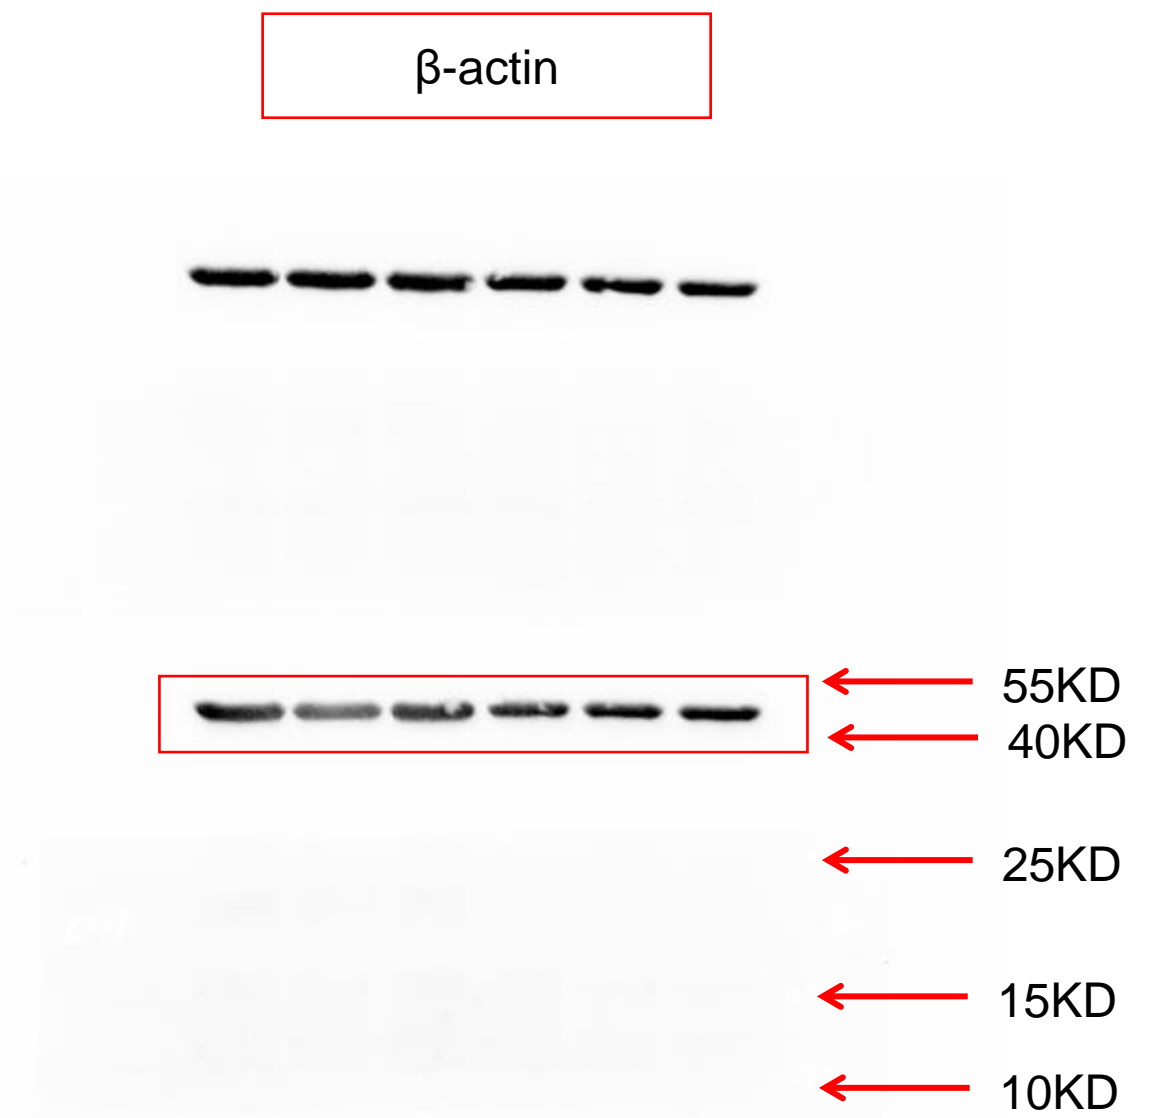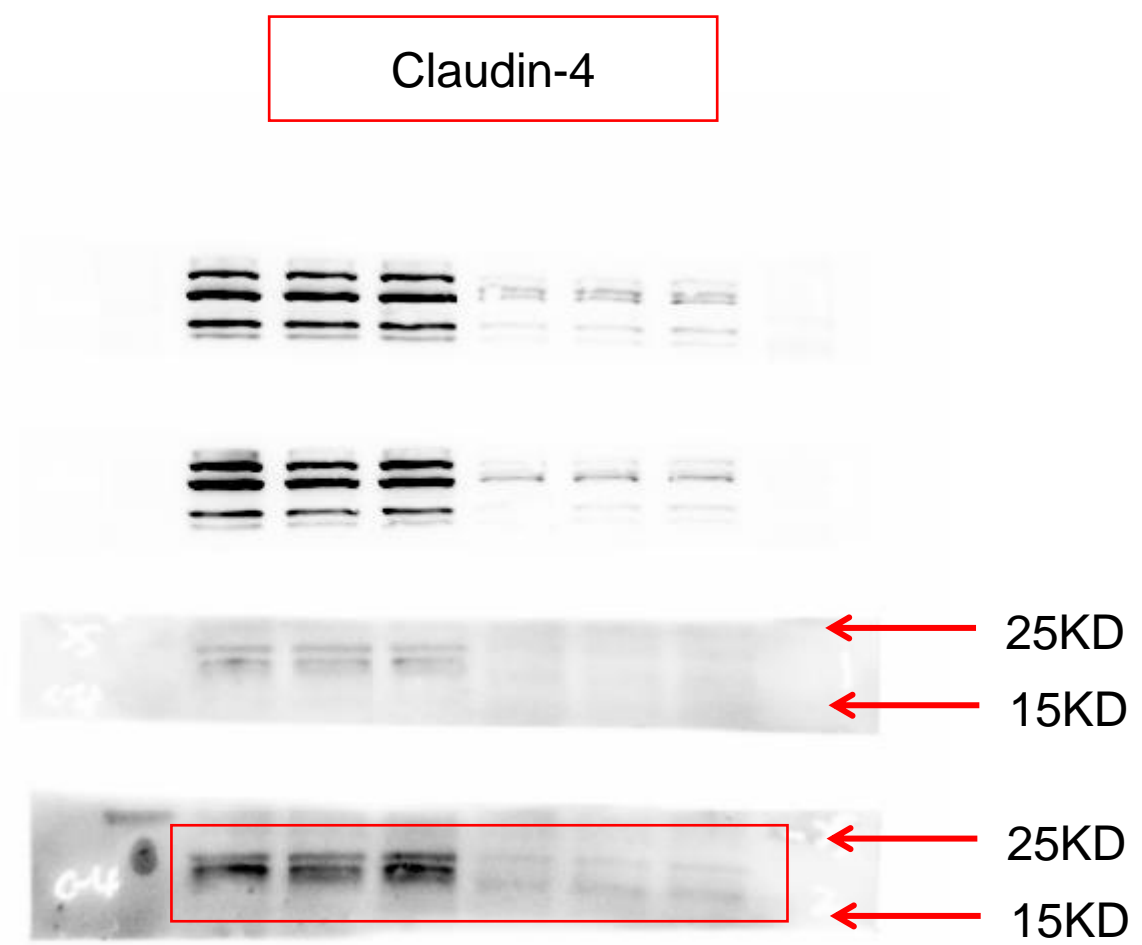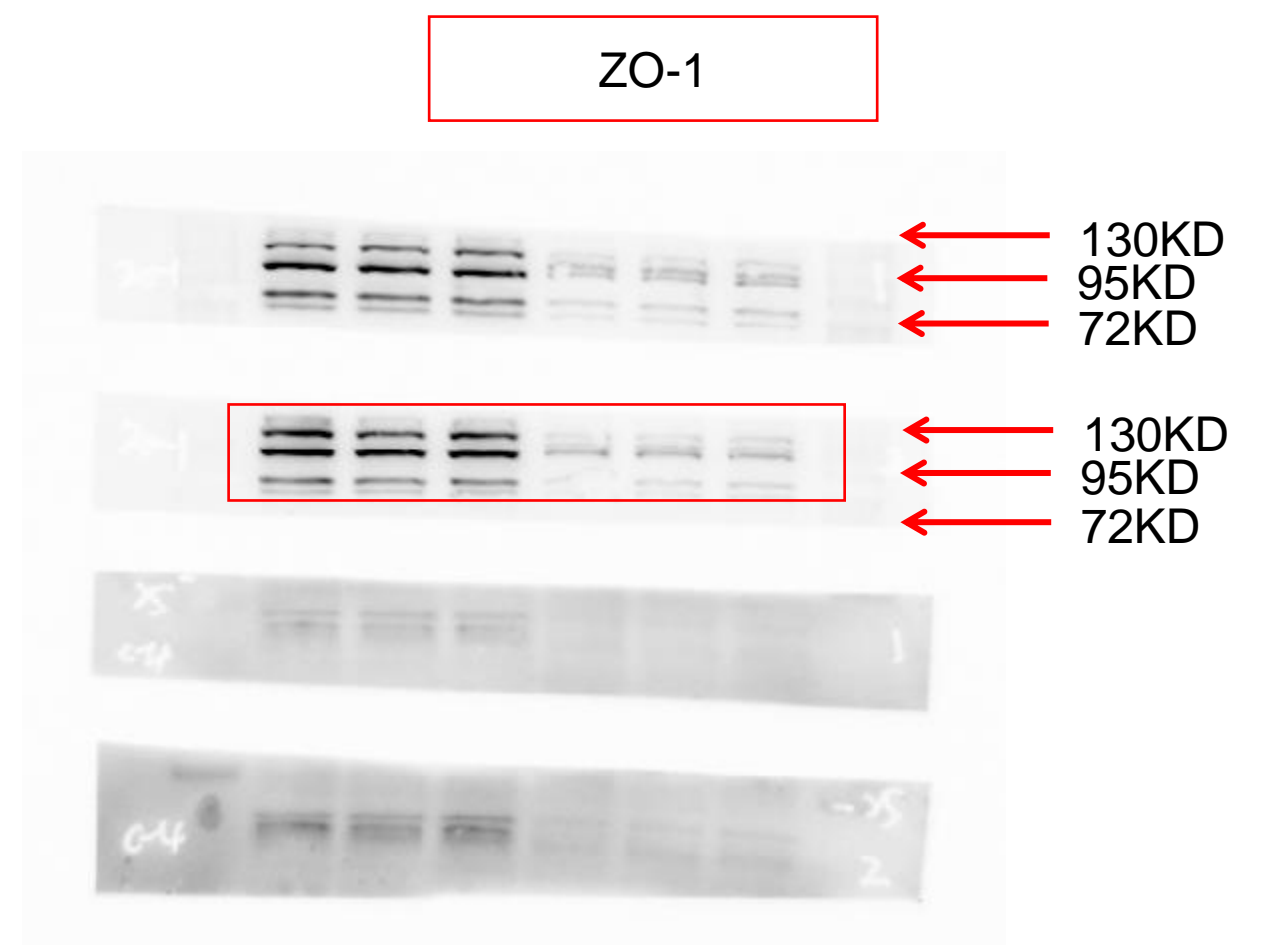

# Supplement Figure 6A

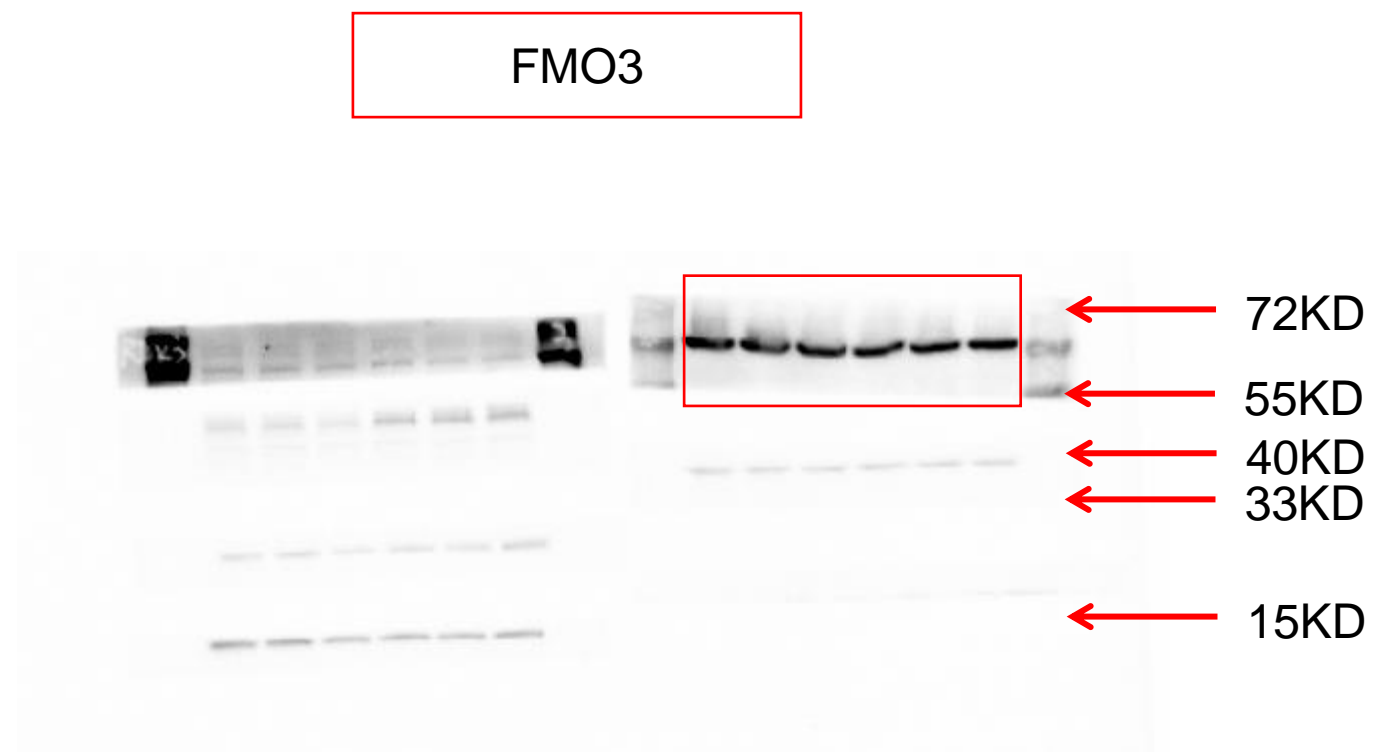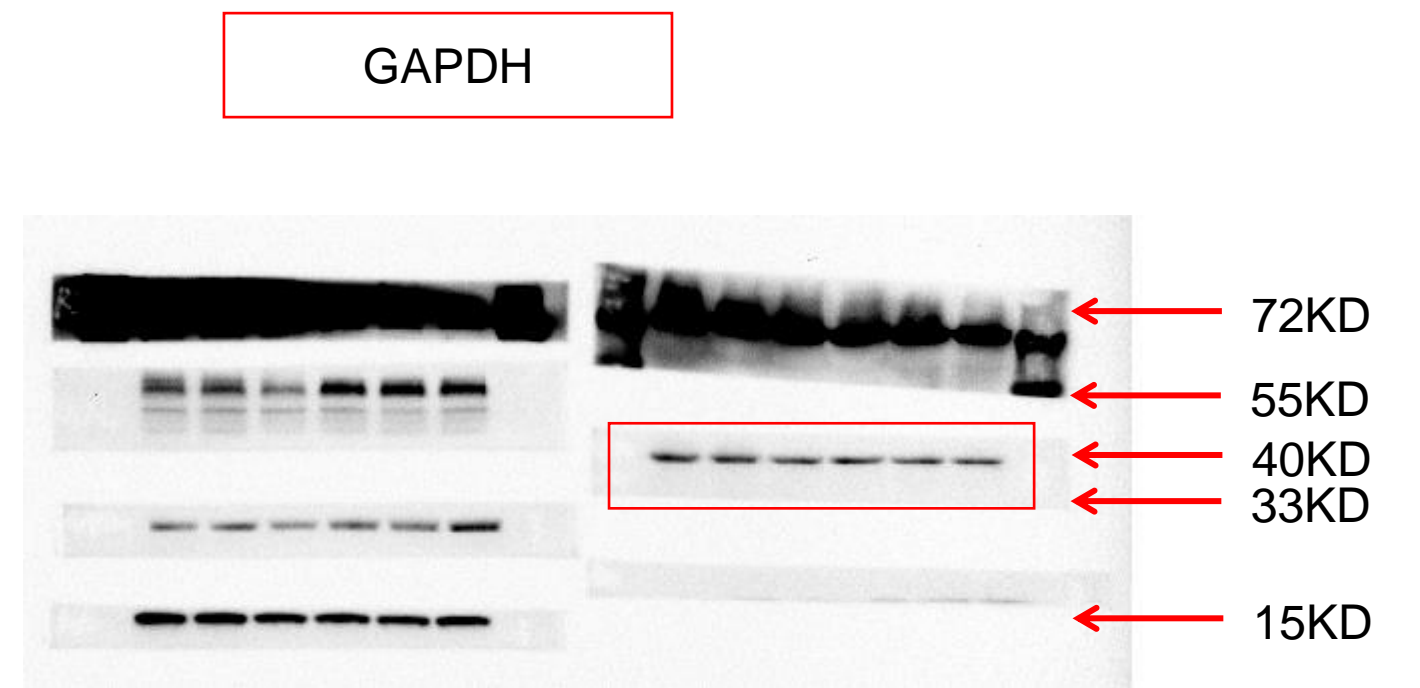

# Supplement Figure 9C

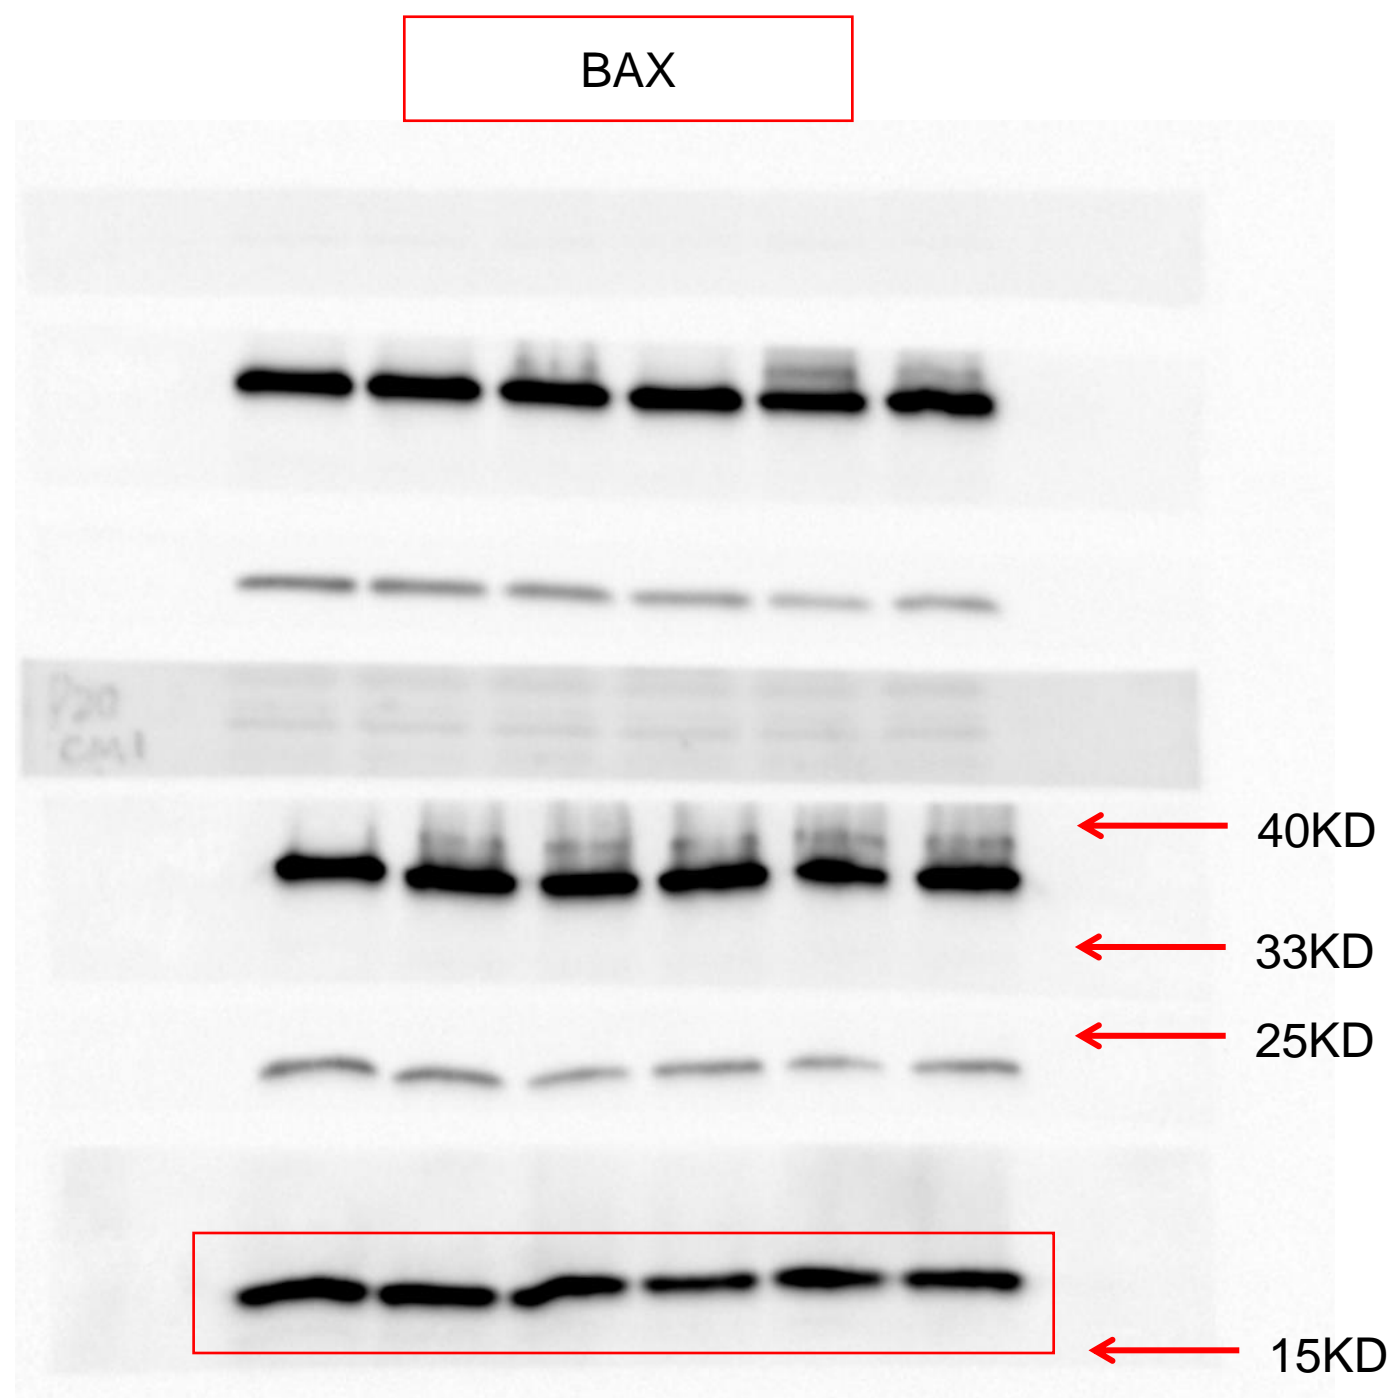

# Supplement Figure 9C

Bcl2

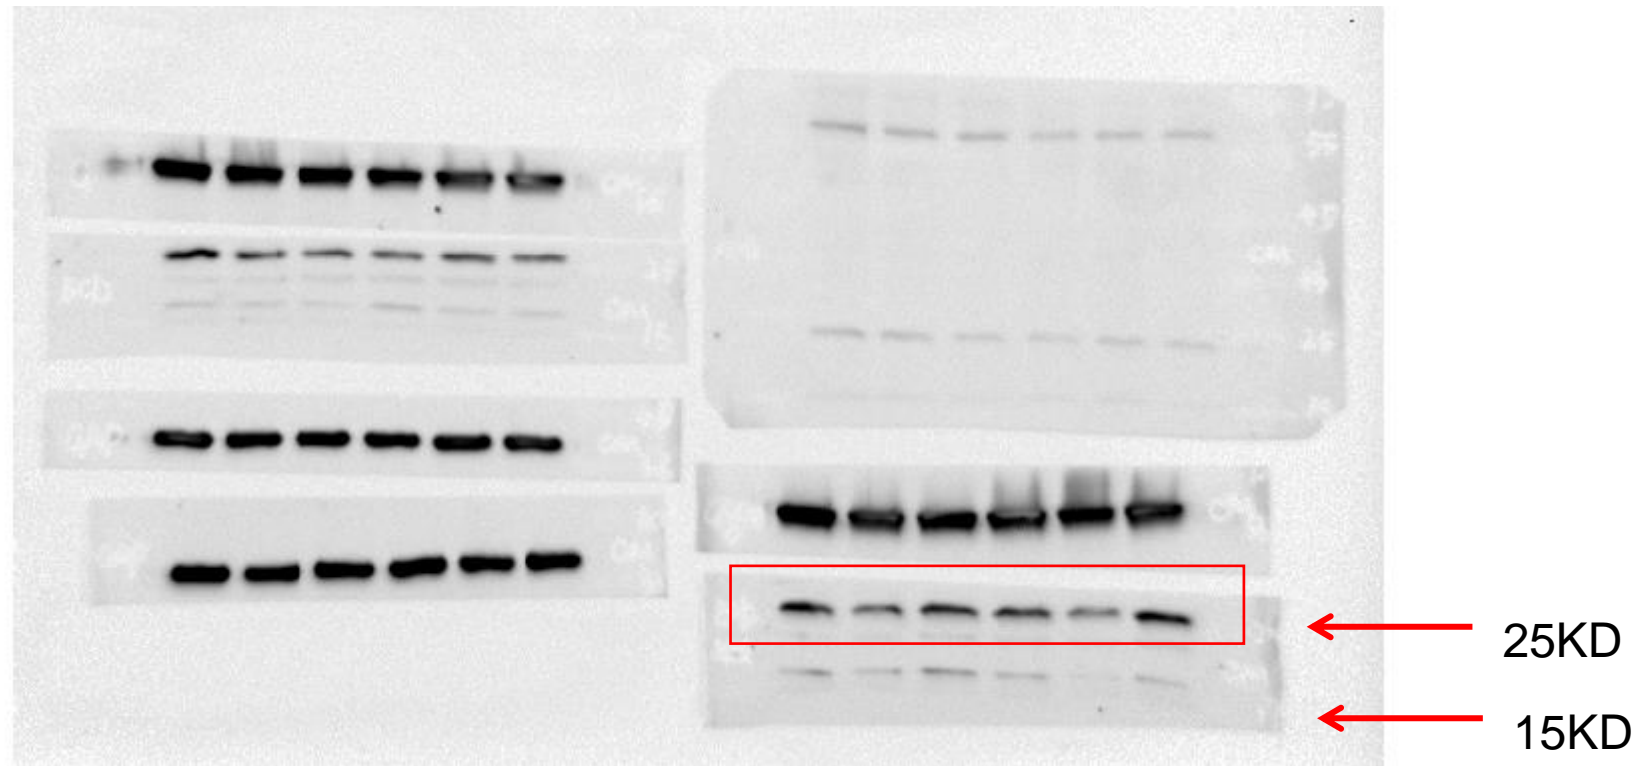

GAPDH

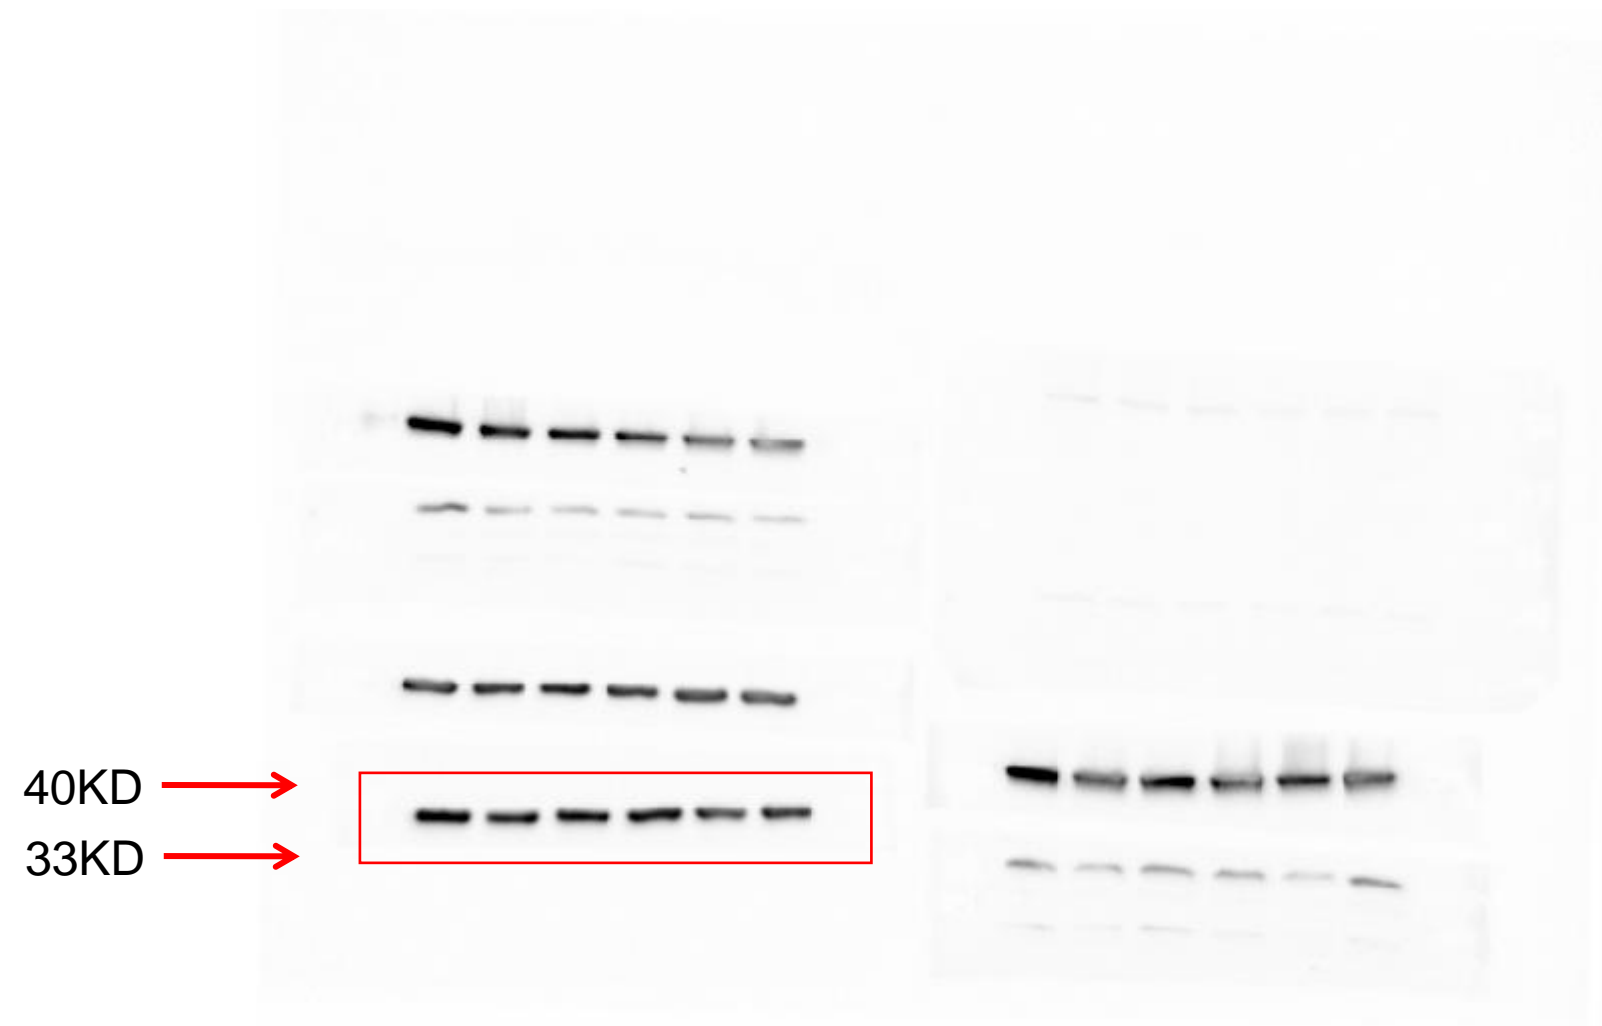

# Supplement Figure 9D

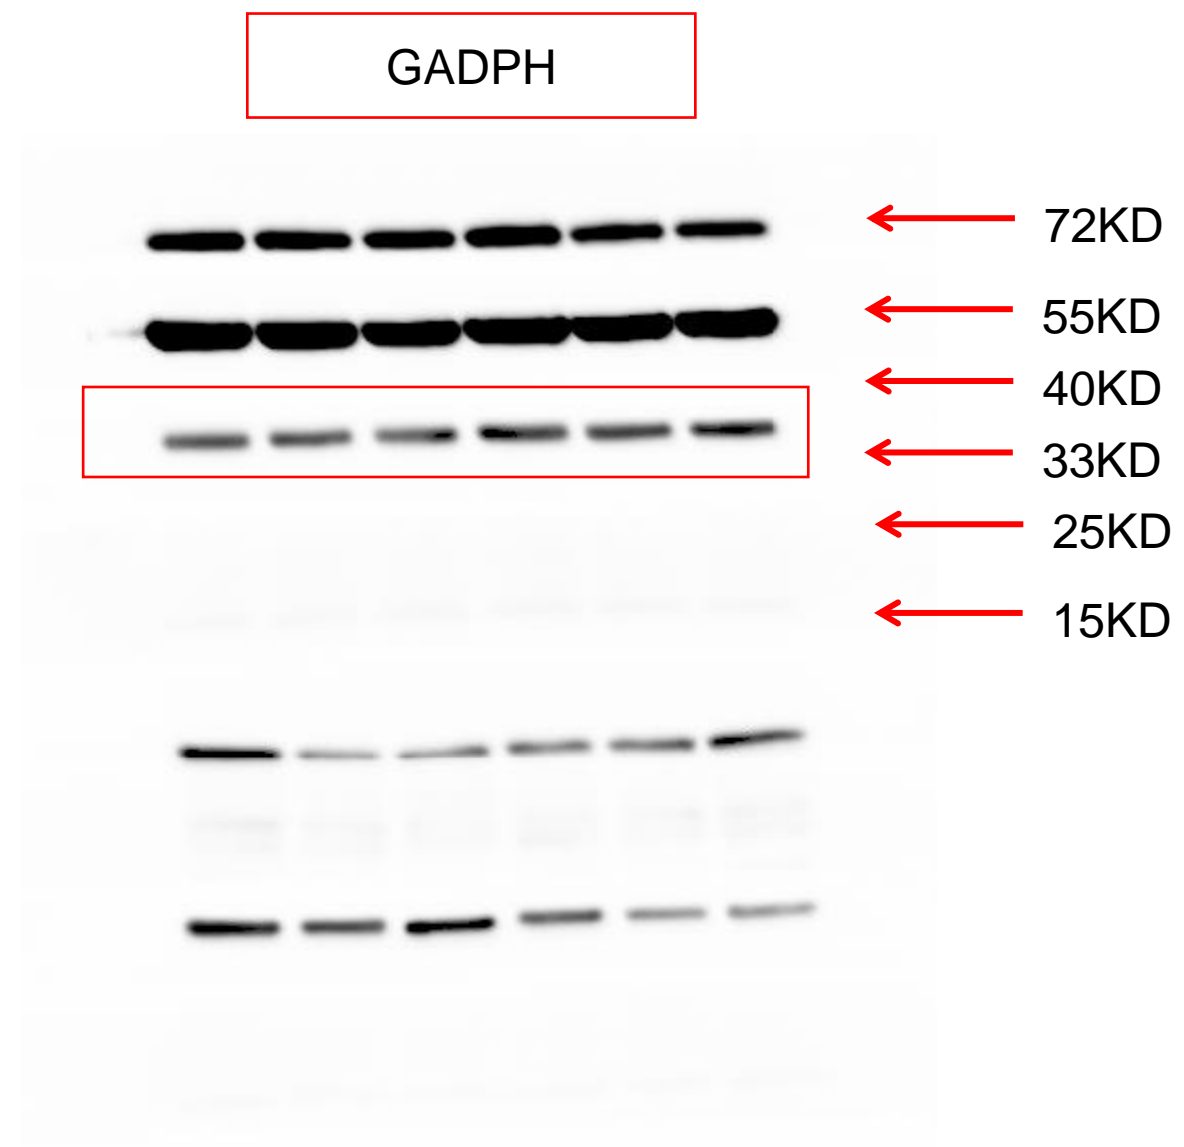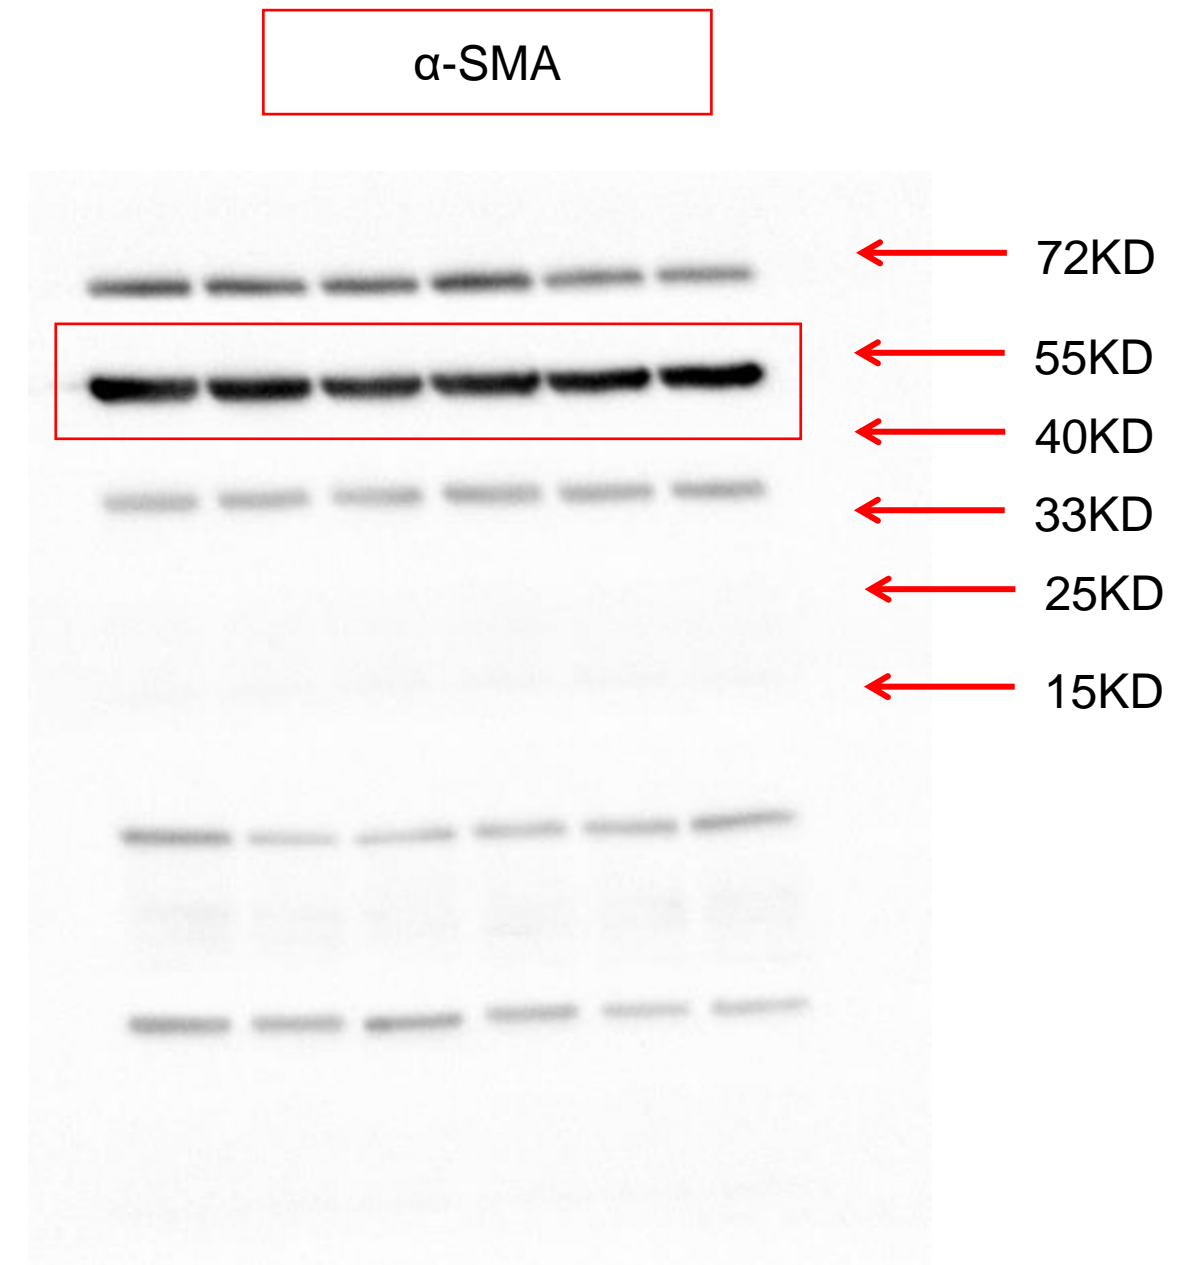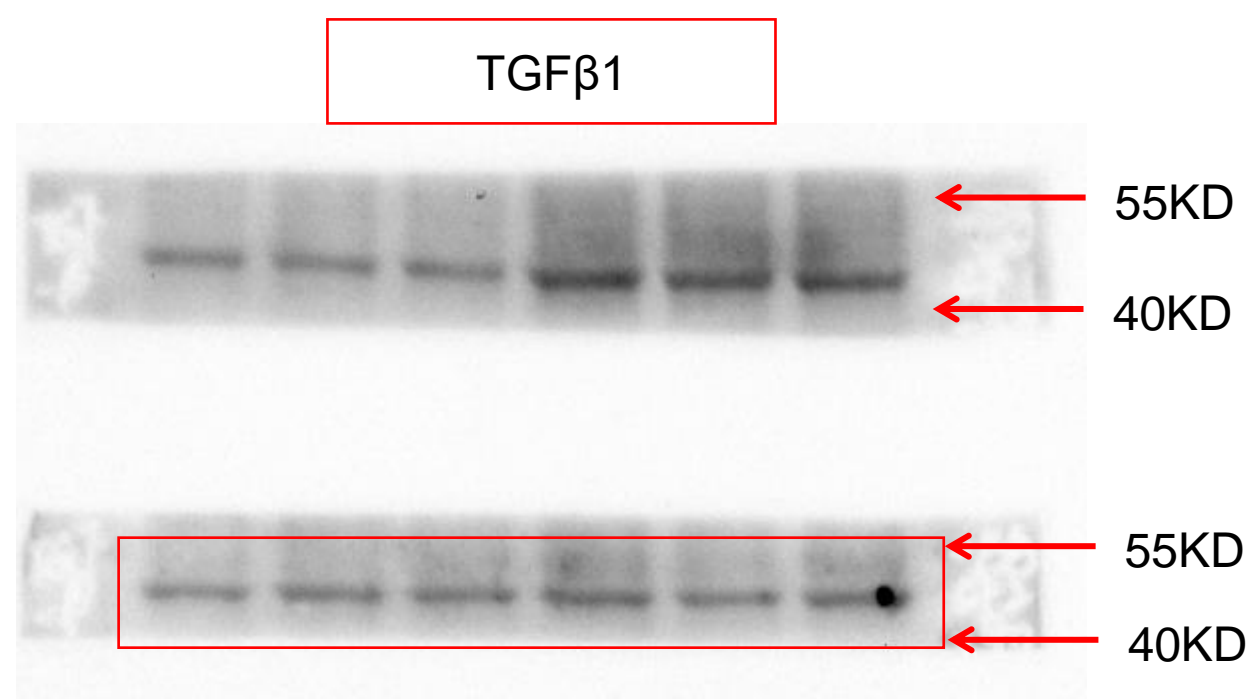

# Supplement Figure 10A(Cardiac myocytes)

Casp1-p20

Cleaved-GSDMD

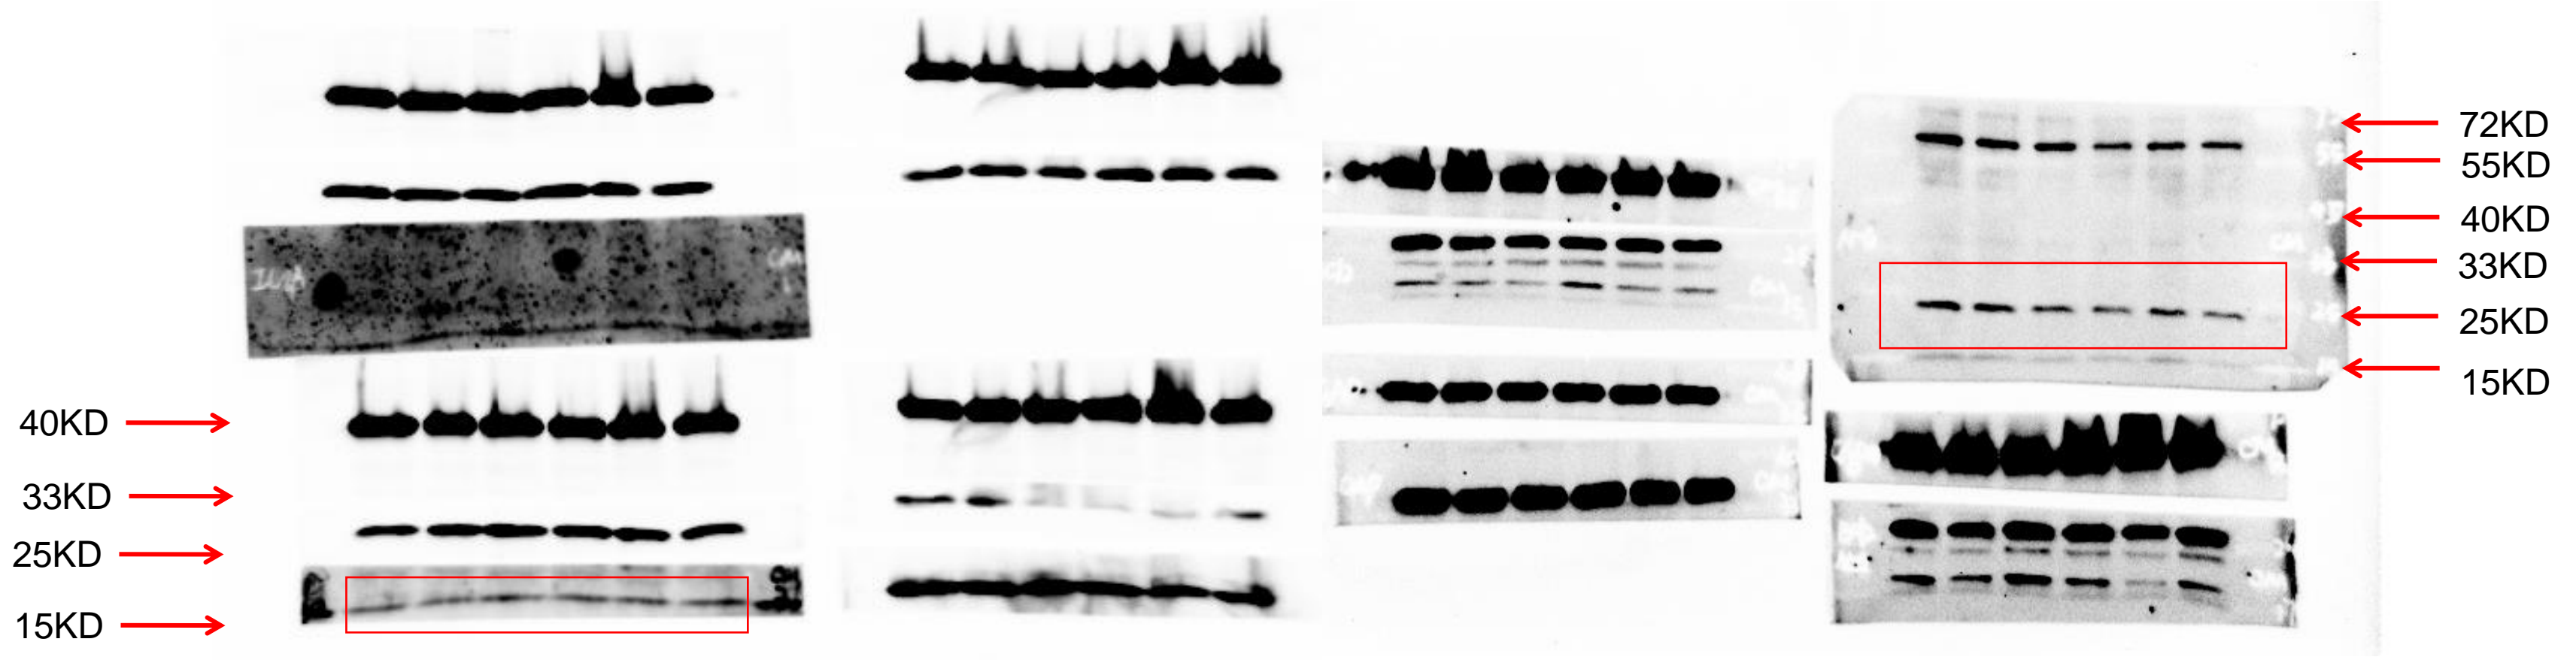

GAPDH

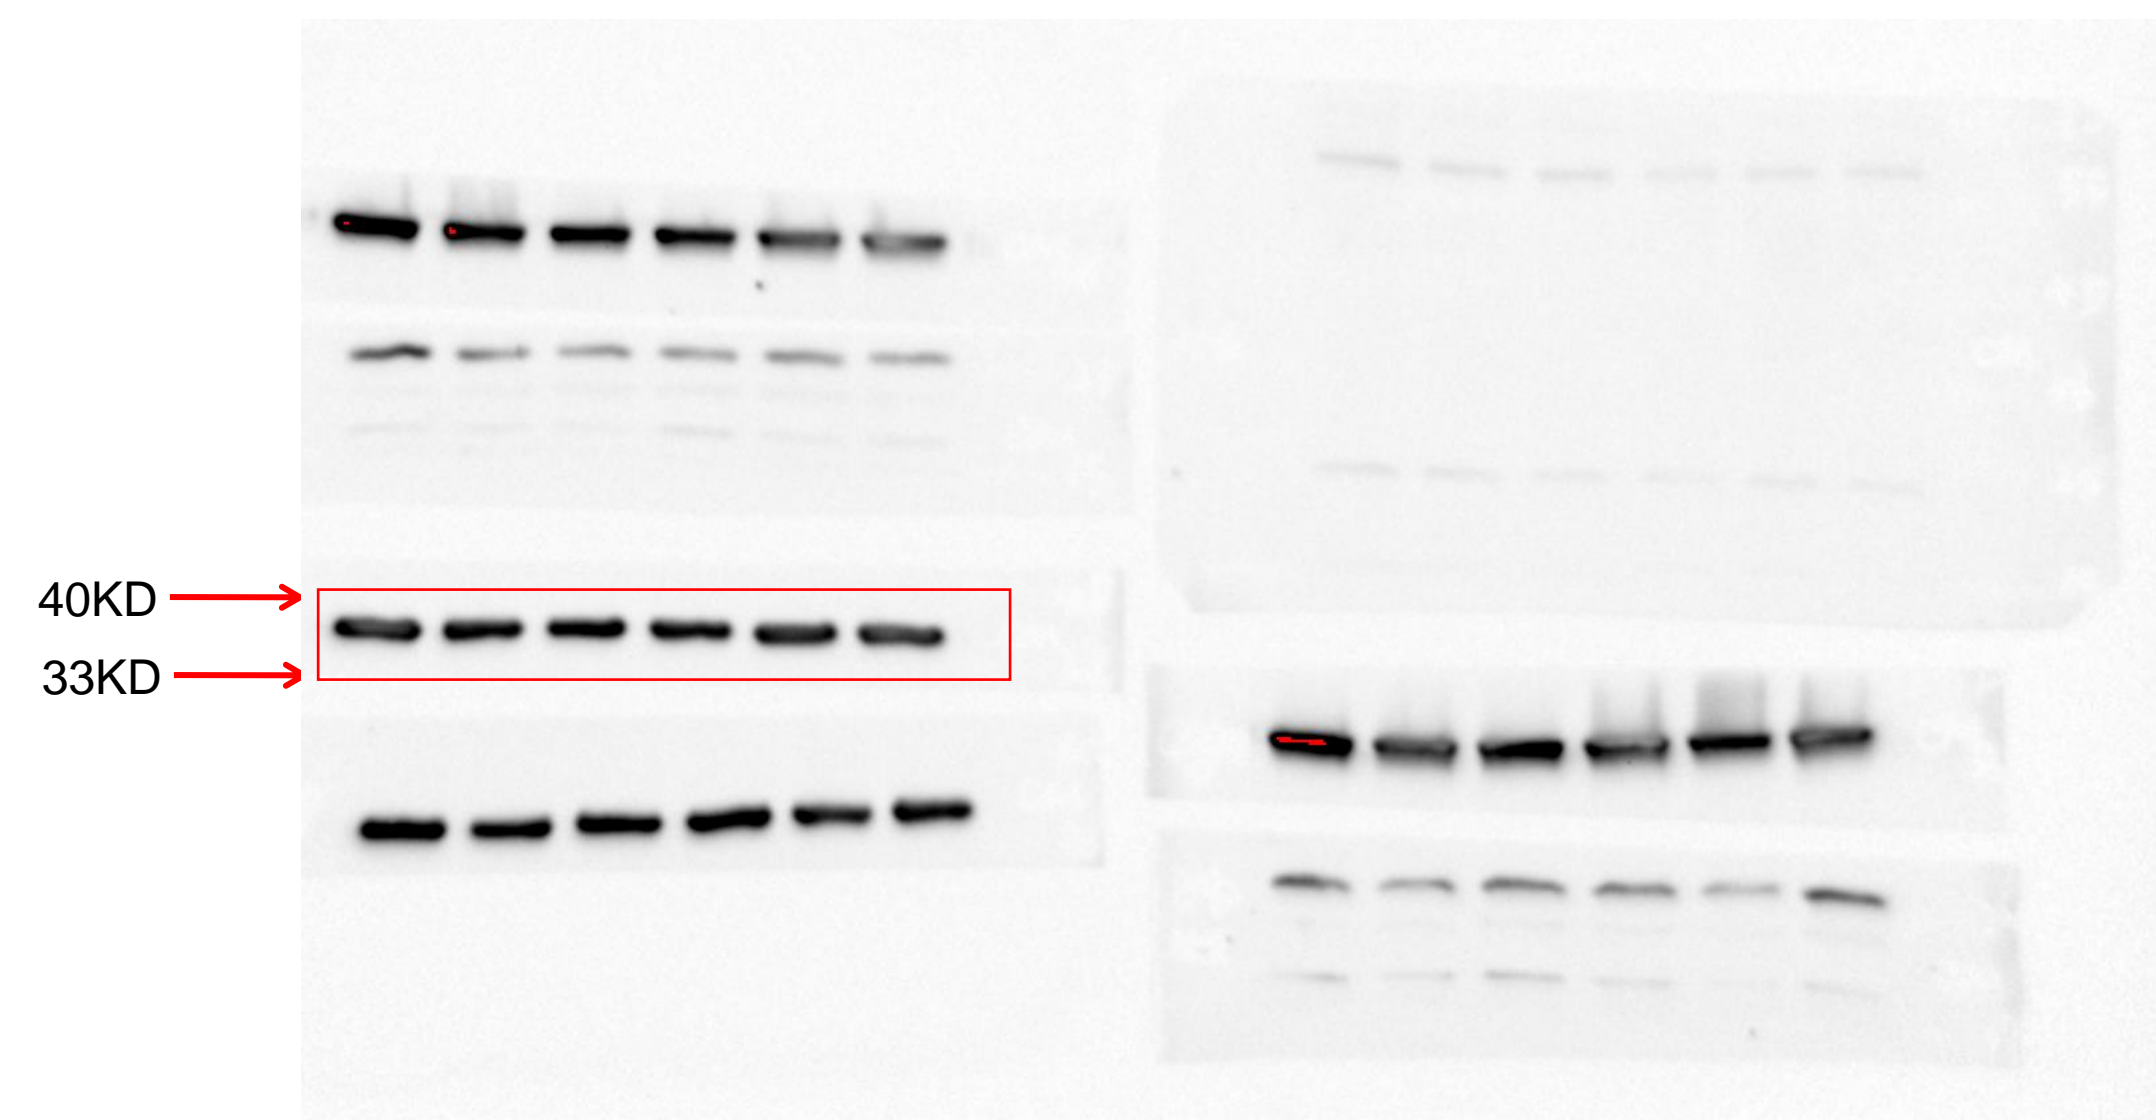

# Supplement Figure 10A(Cardiac fibroblasts)

Cleaved-GSDMD

GADPH

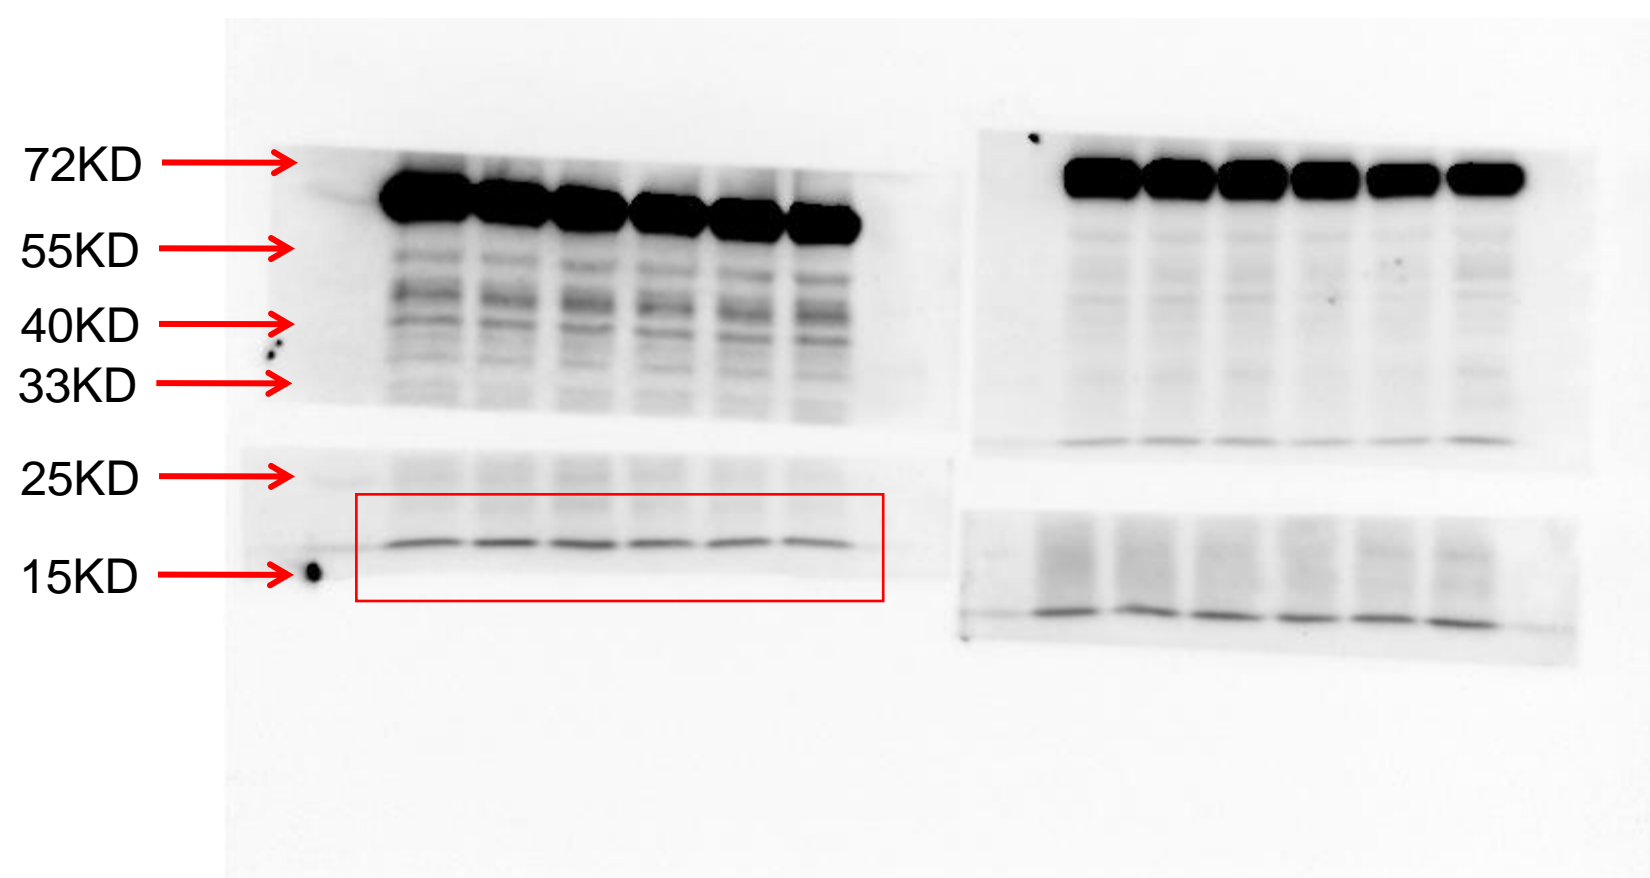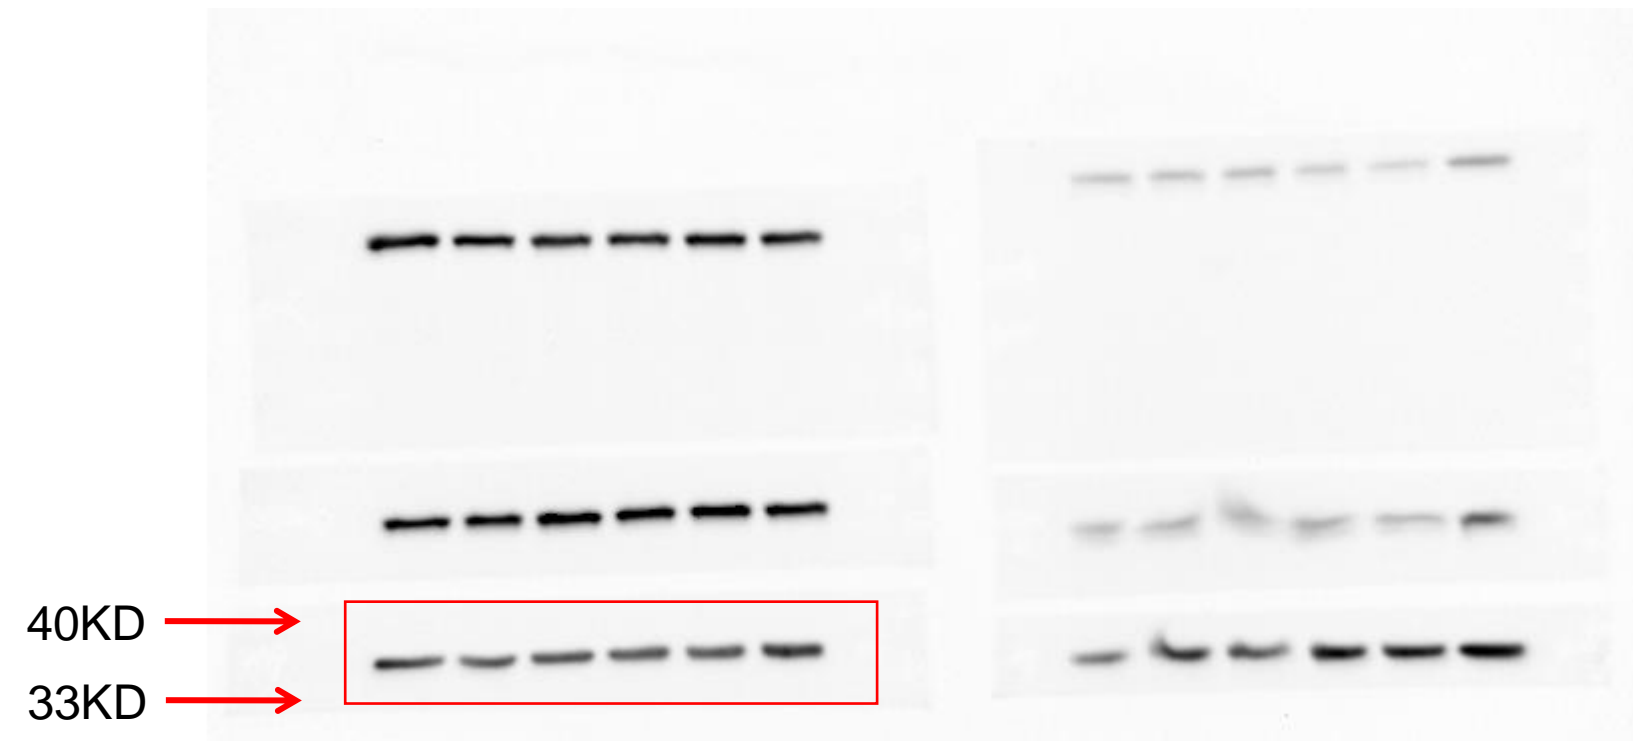

Casp1-p20

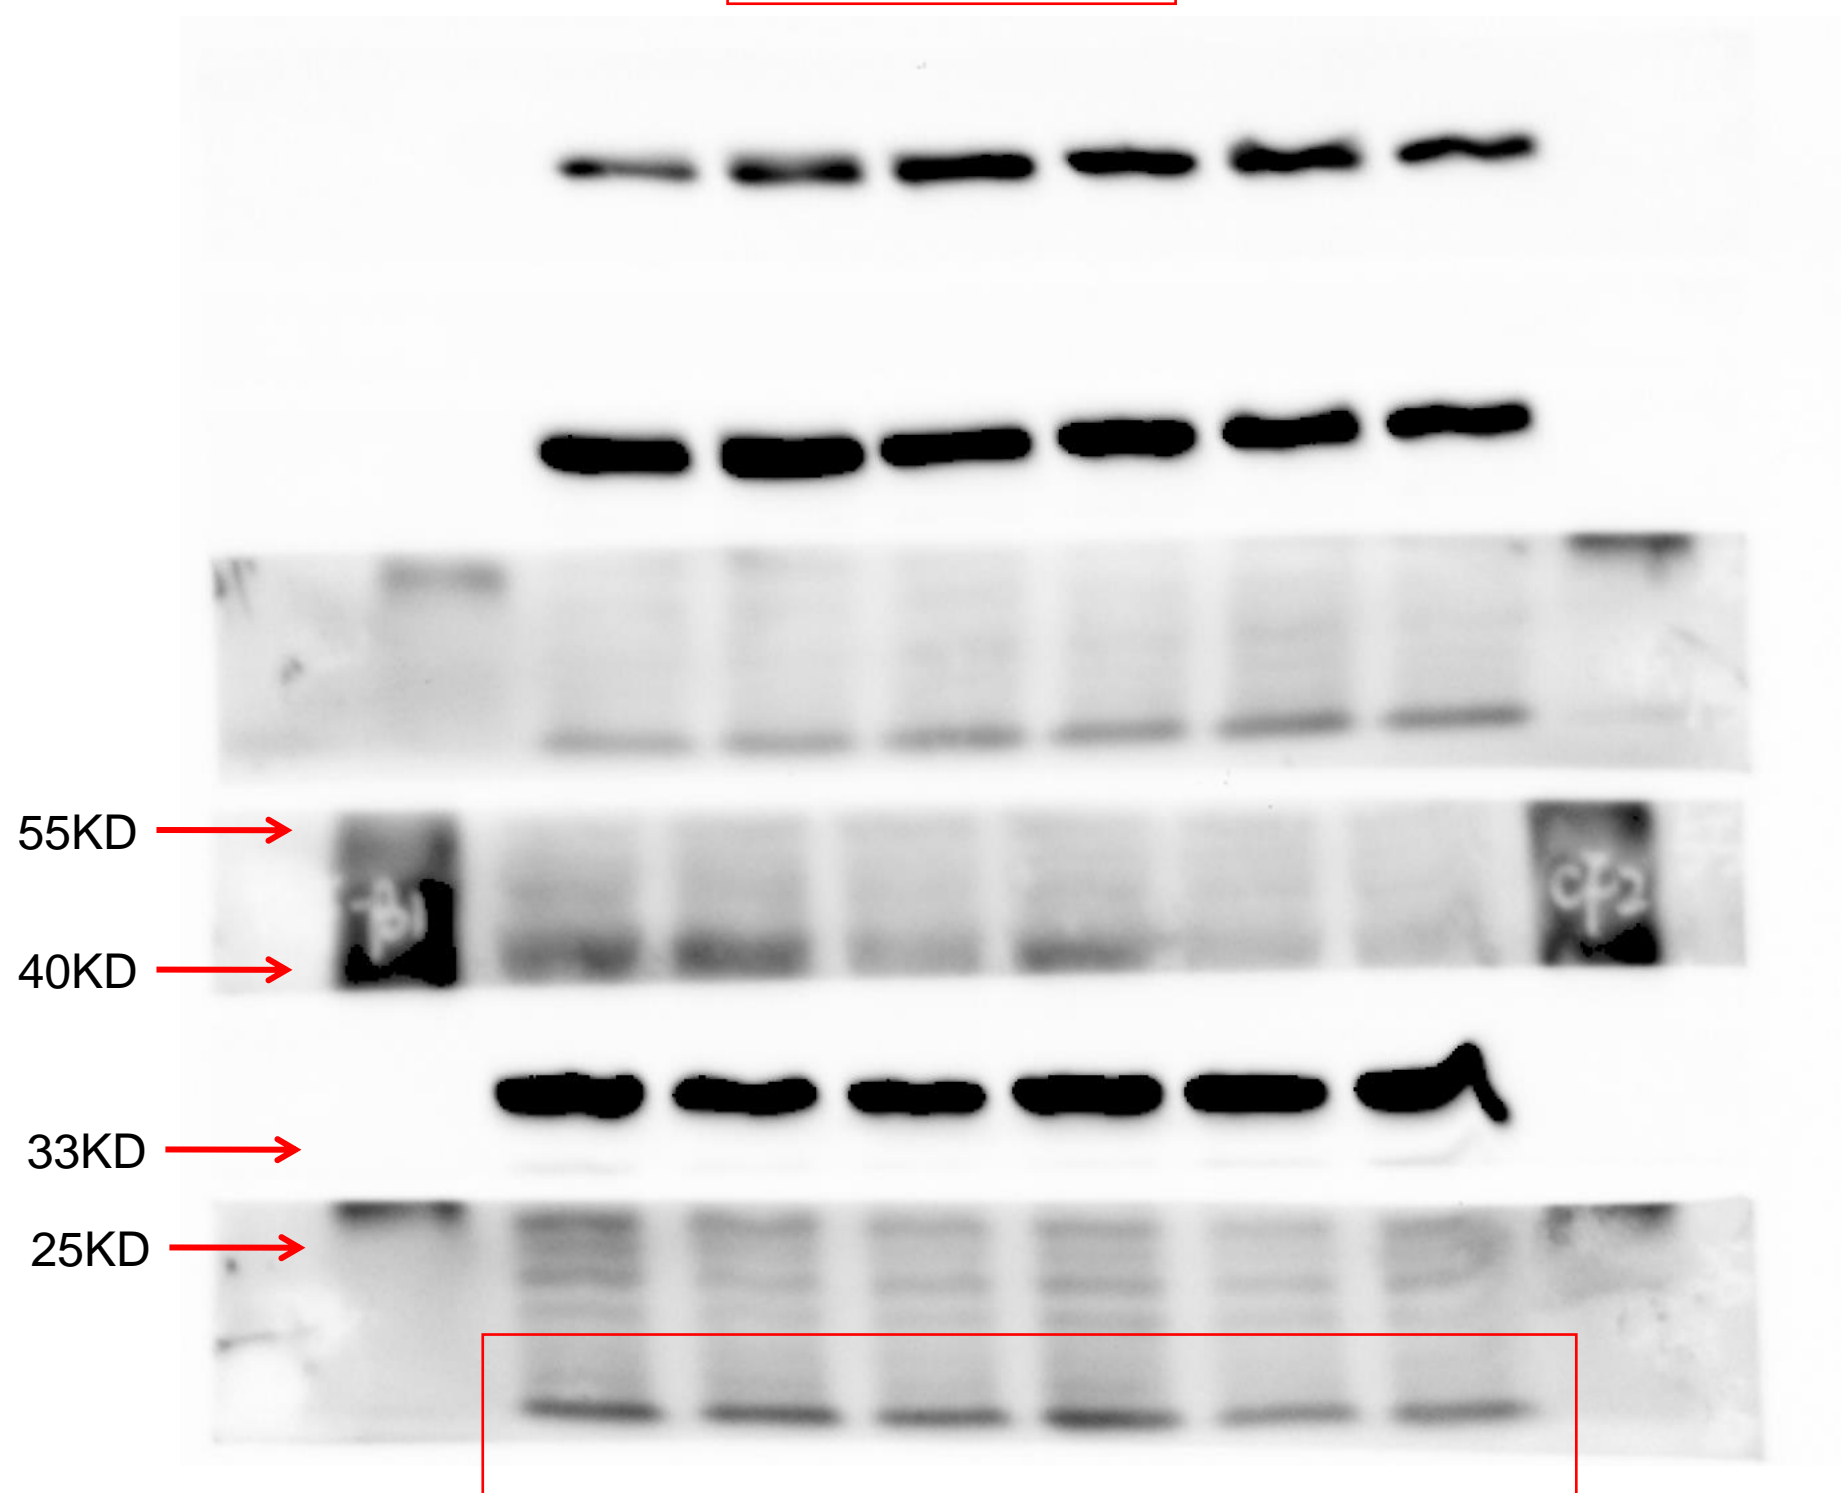



# Supplement Figure 10D

GAPDH

40KD →  
33KD →

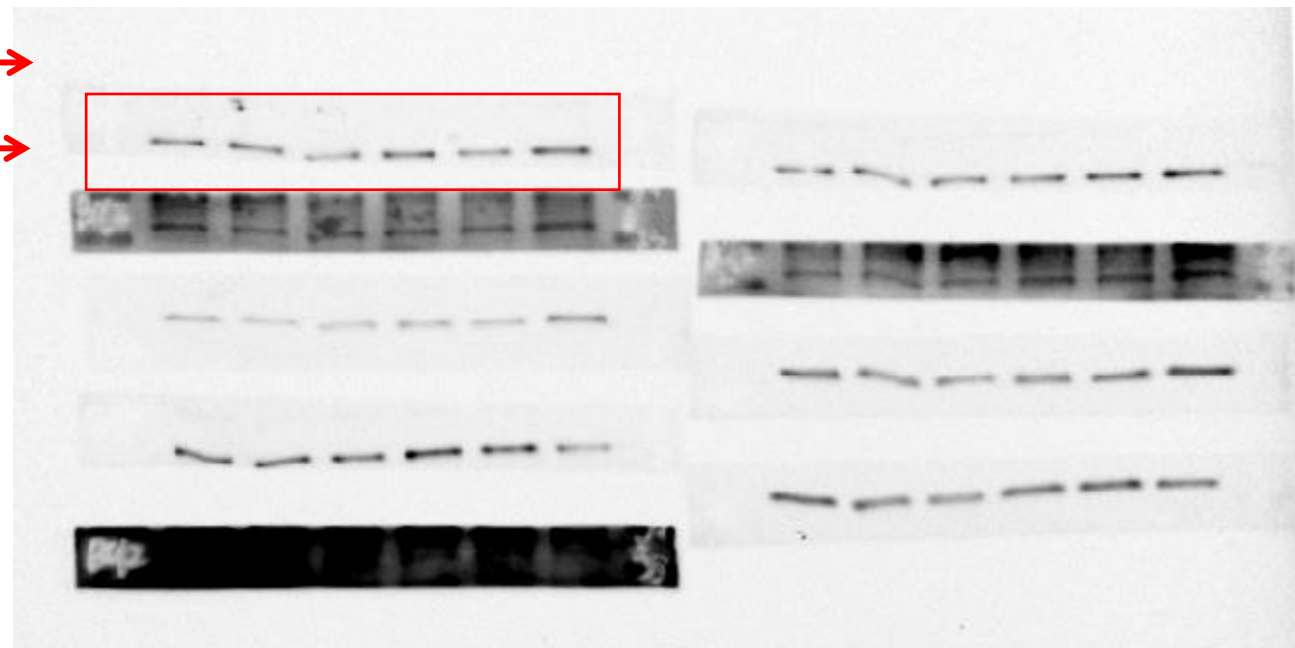

BAX

15KD →

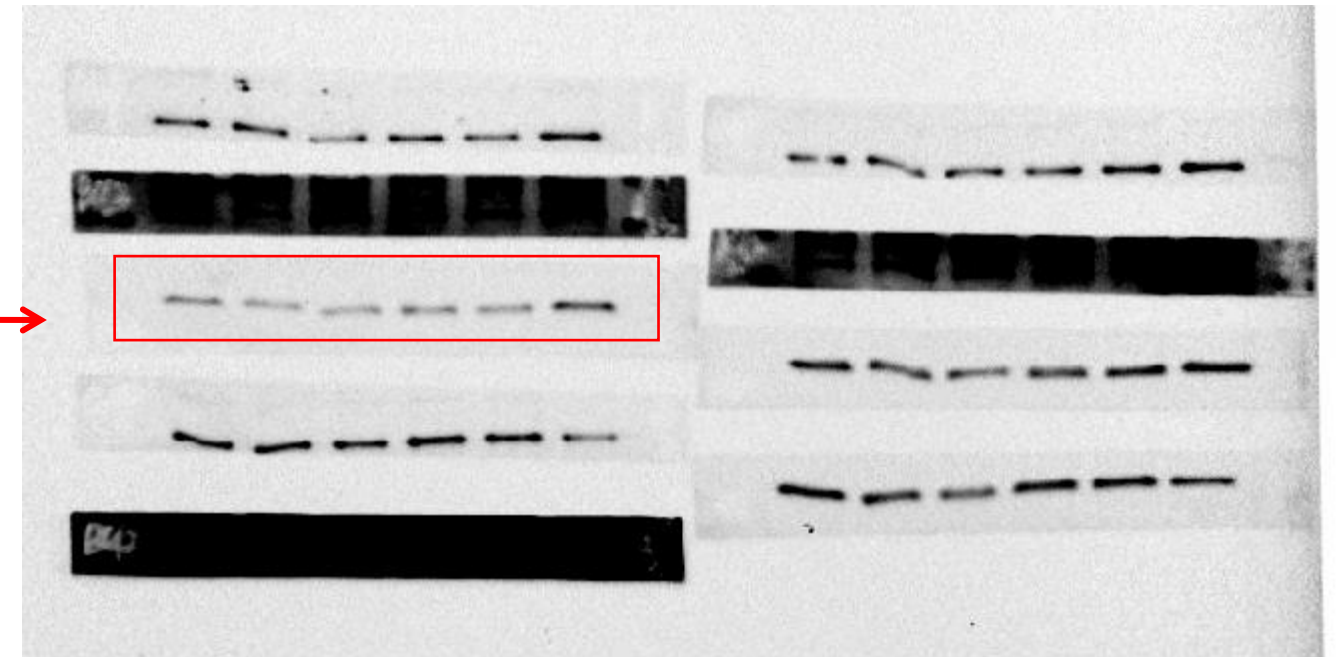

Bcl2

25KD →

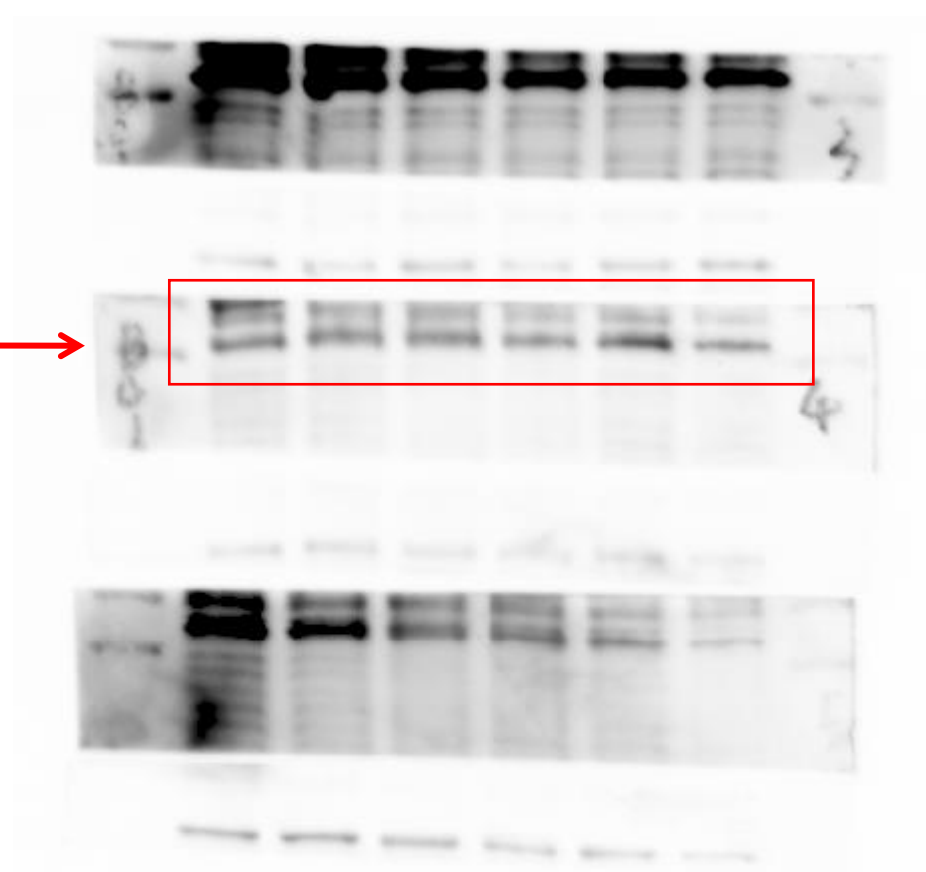

# Supplement Figure 10F

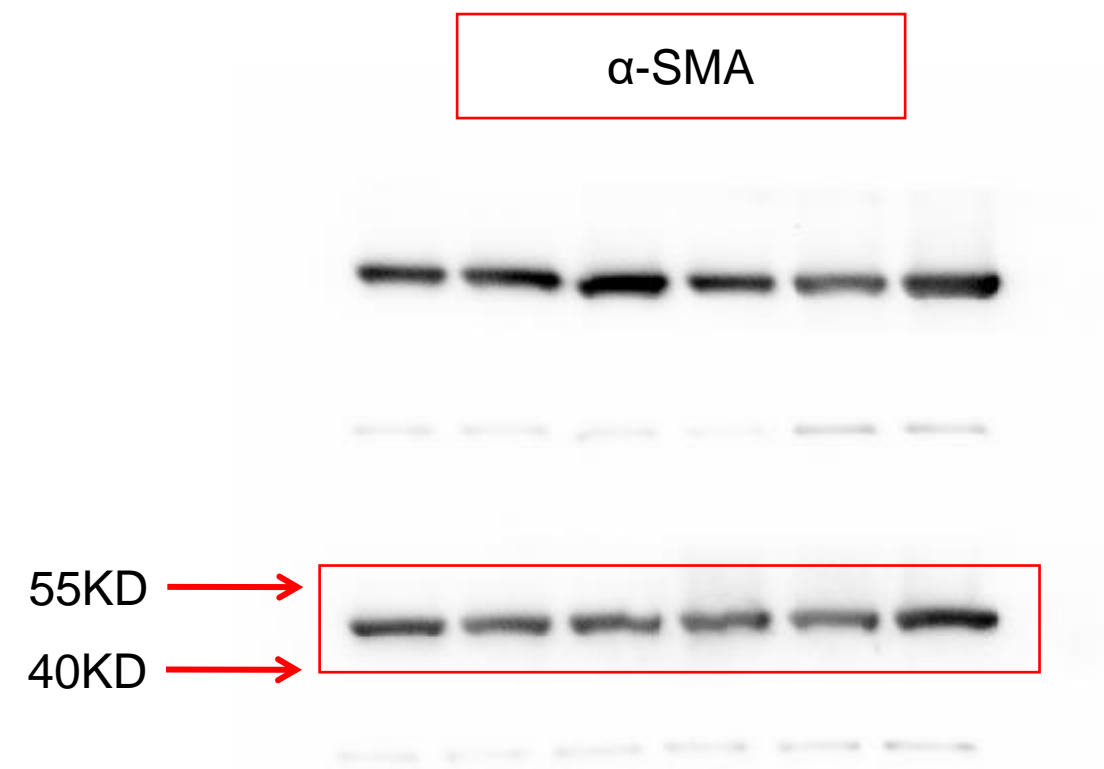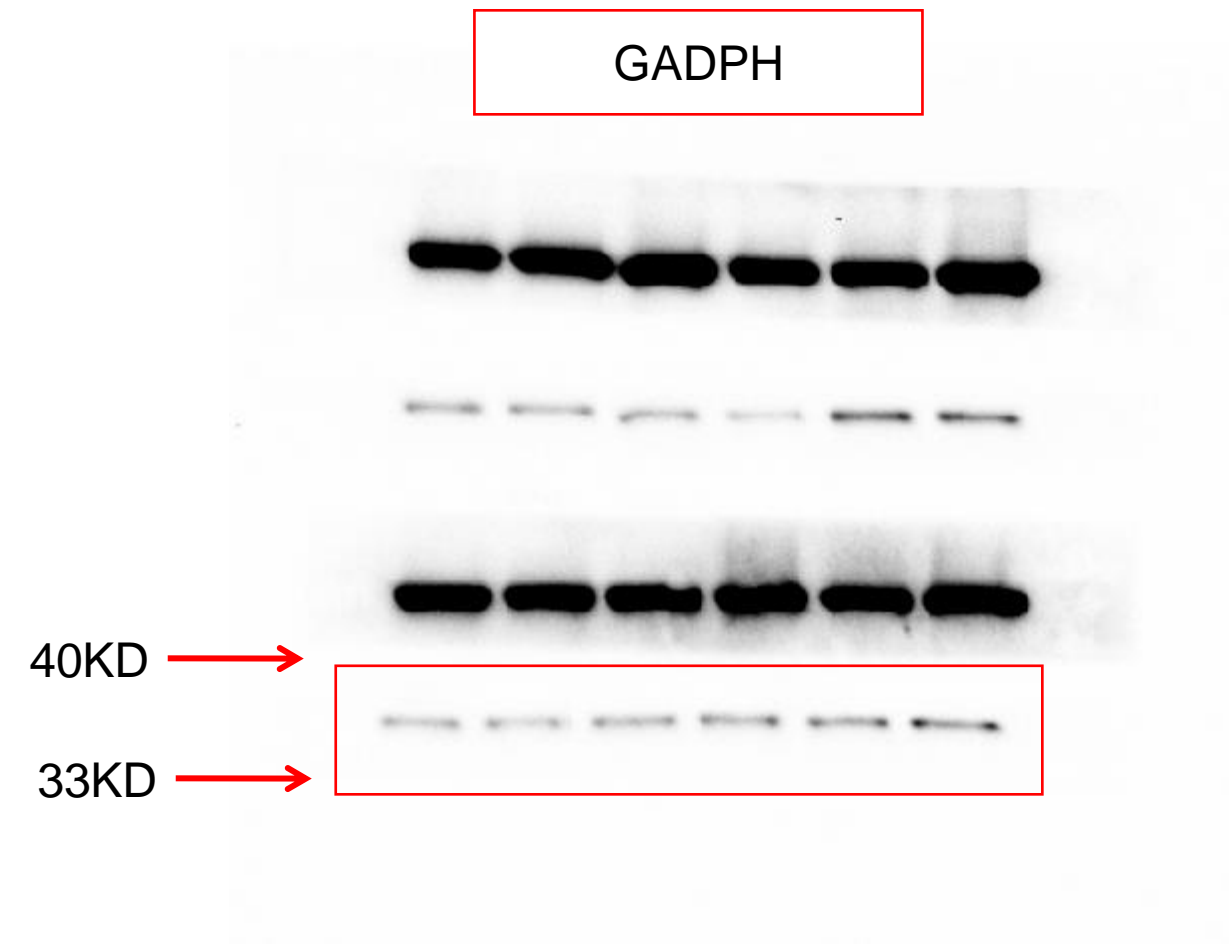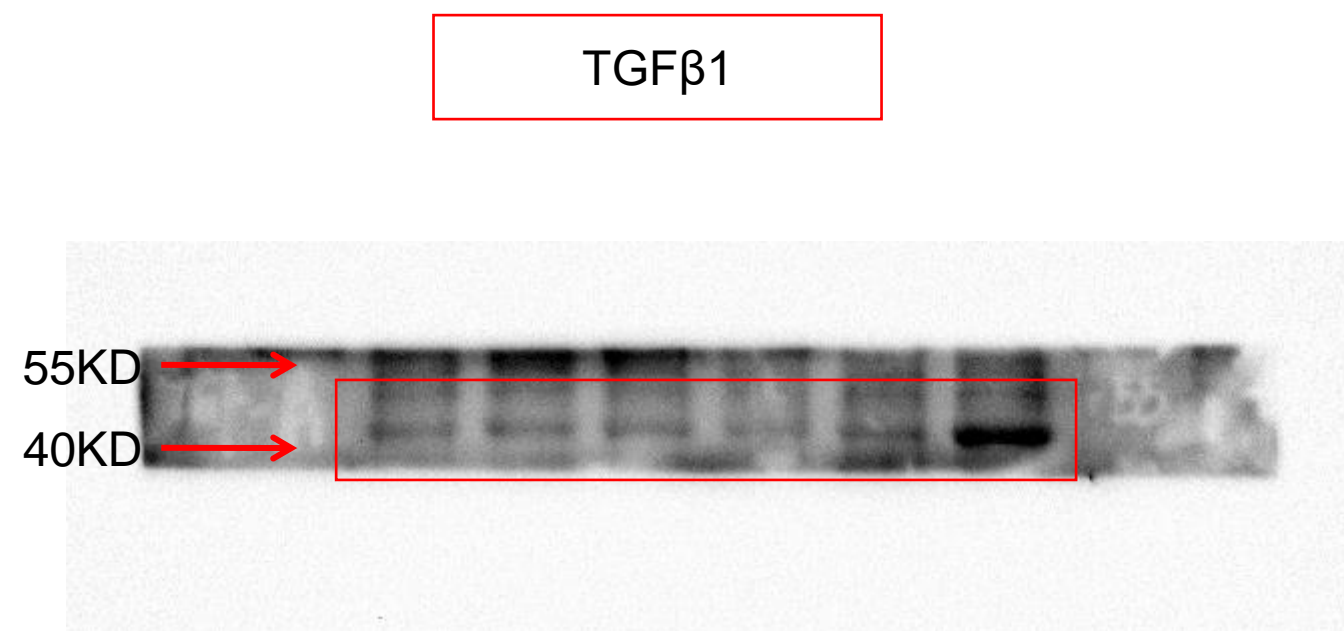

# Supplemental Figure 11A

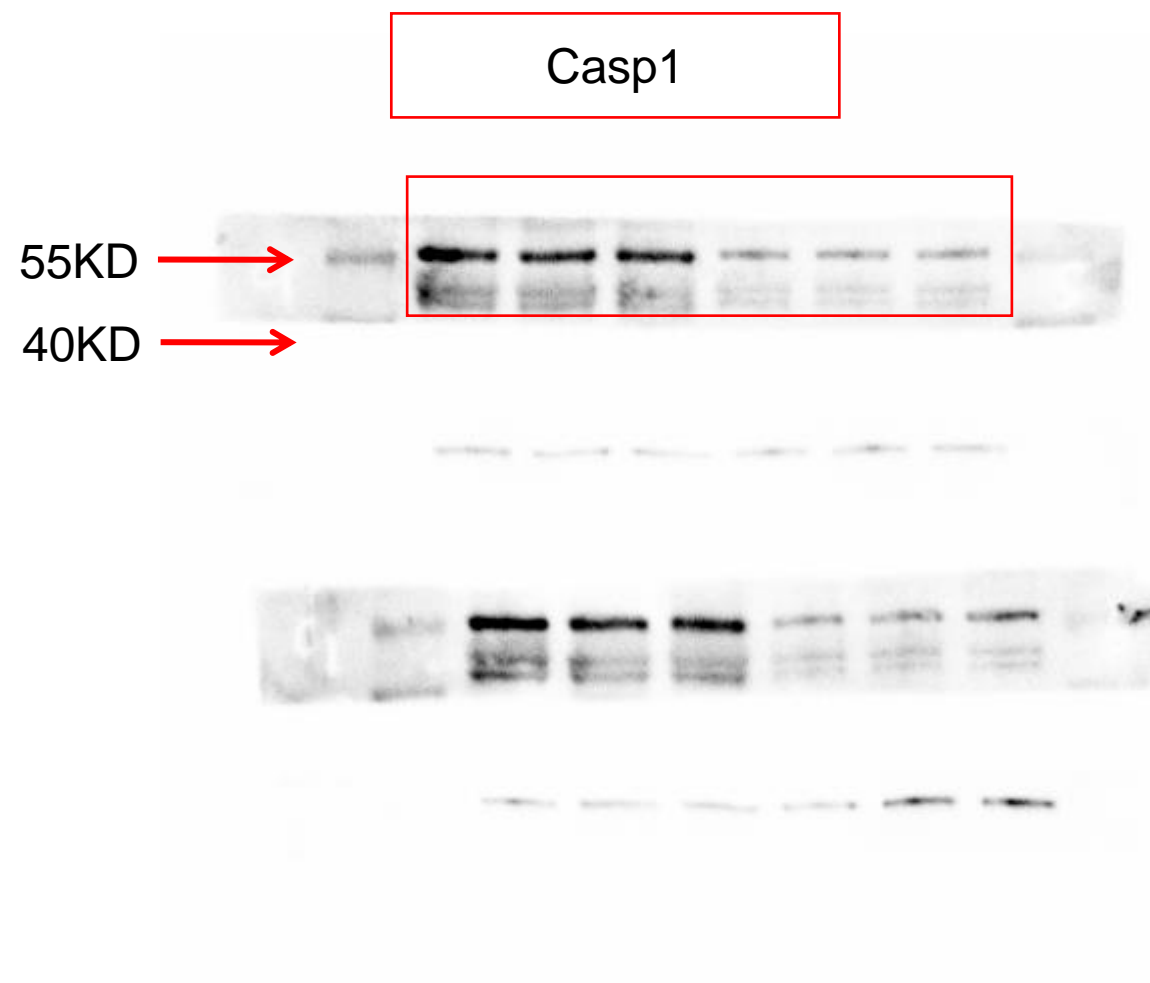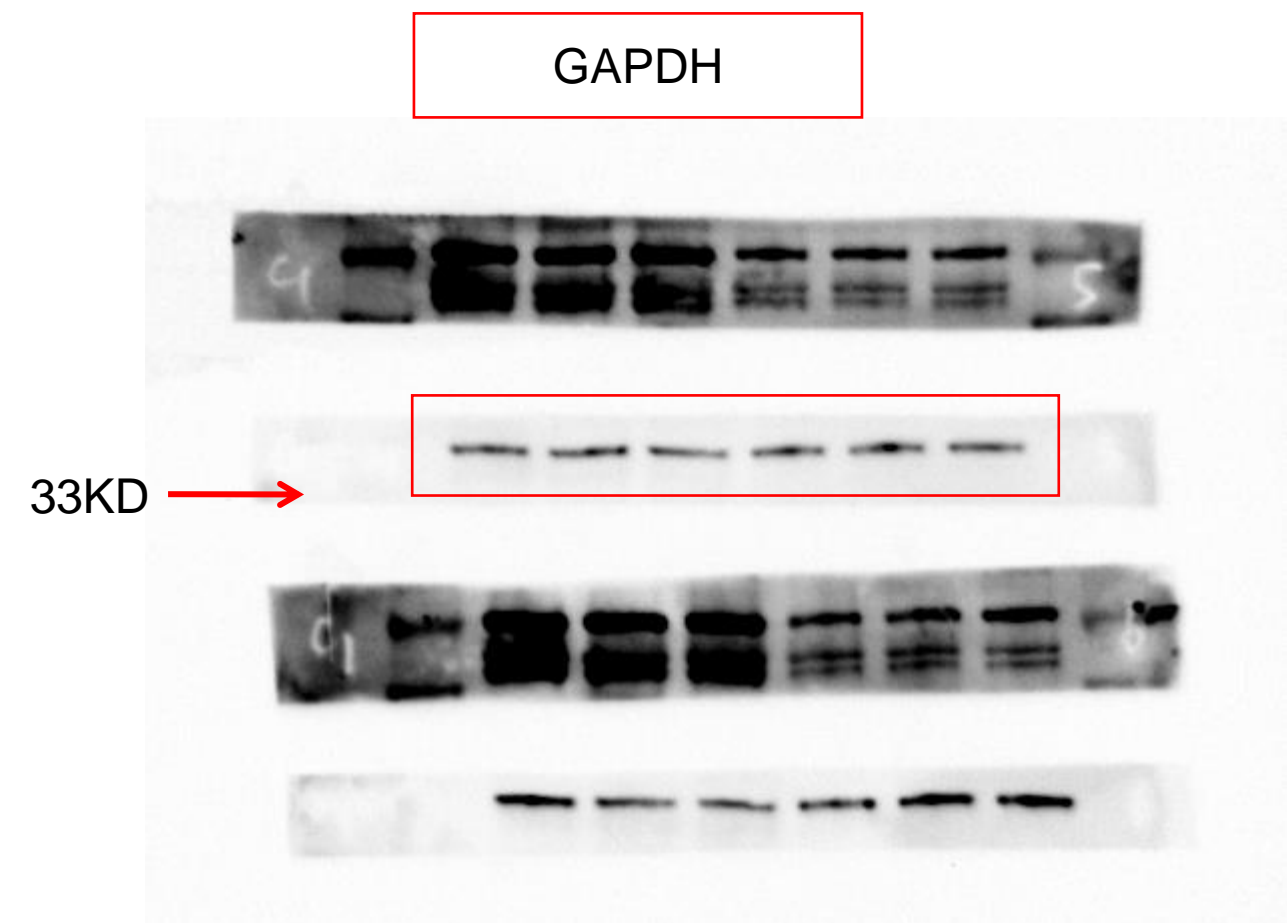

# Supplement Figure 12A

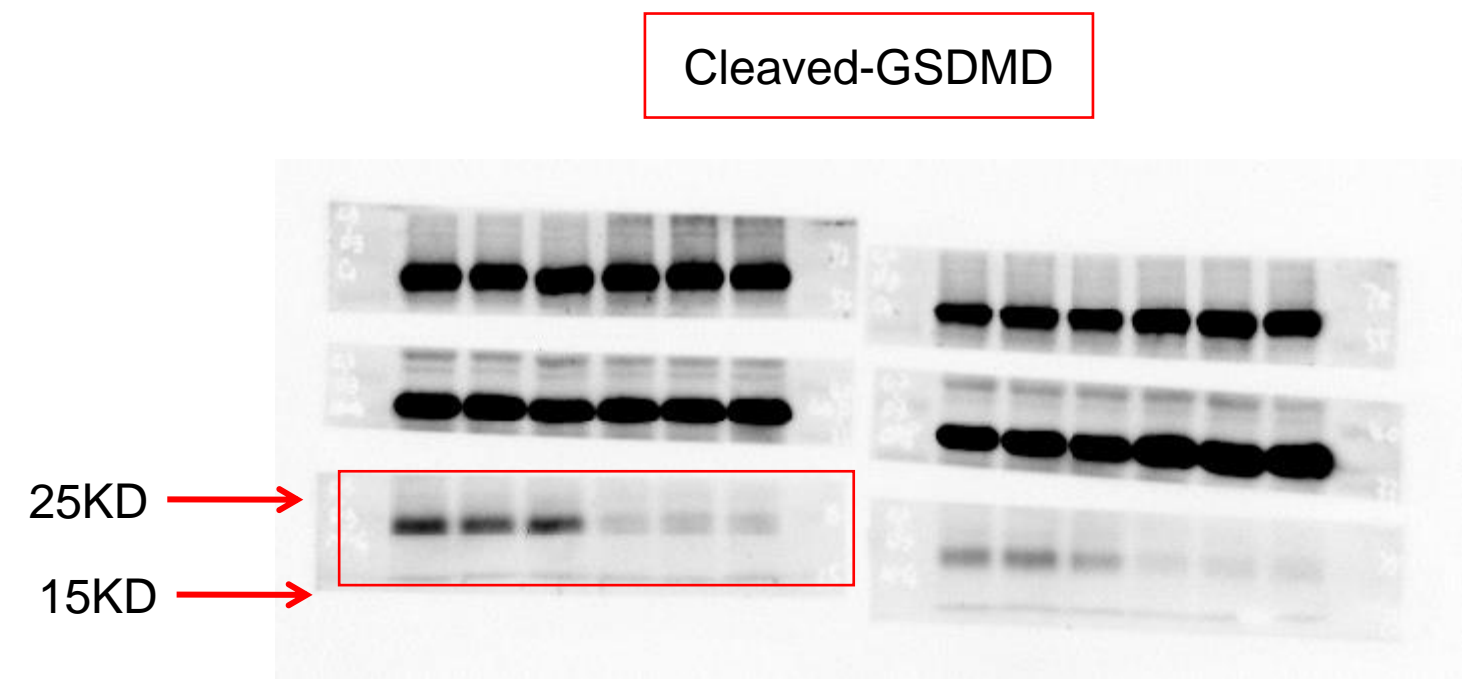

# Supplement Figure 12A

GADPH

Casp1-p20

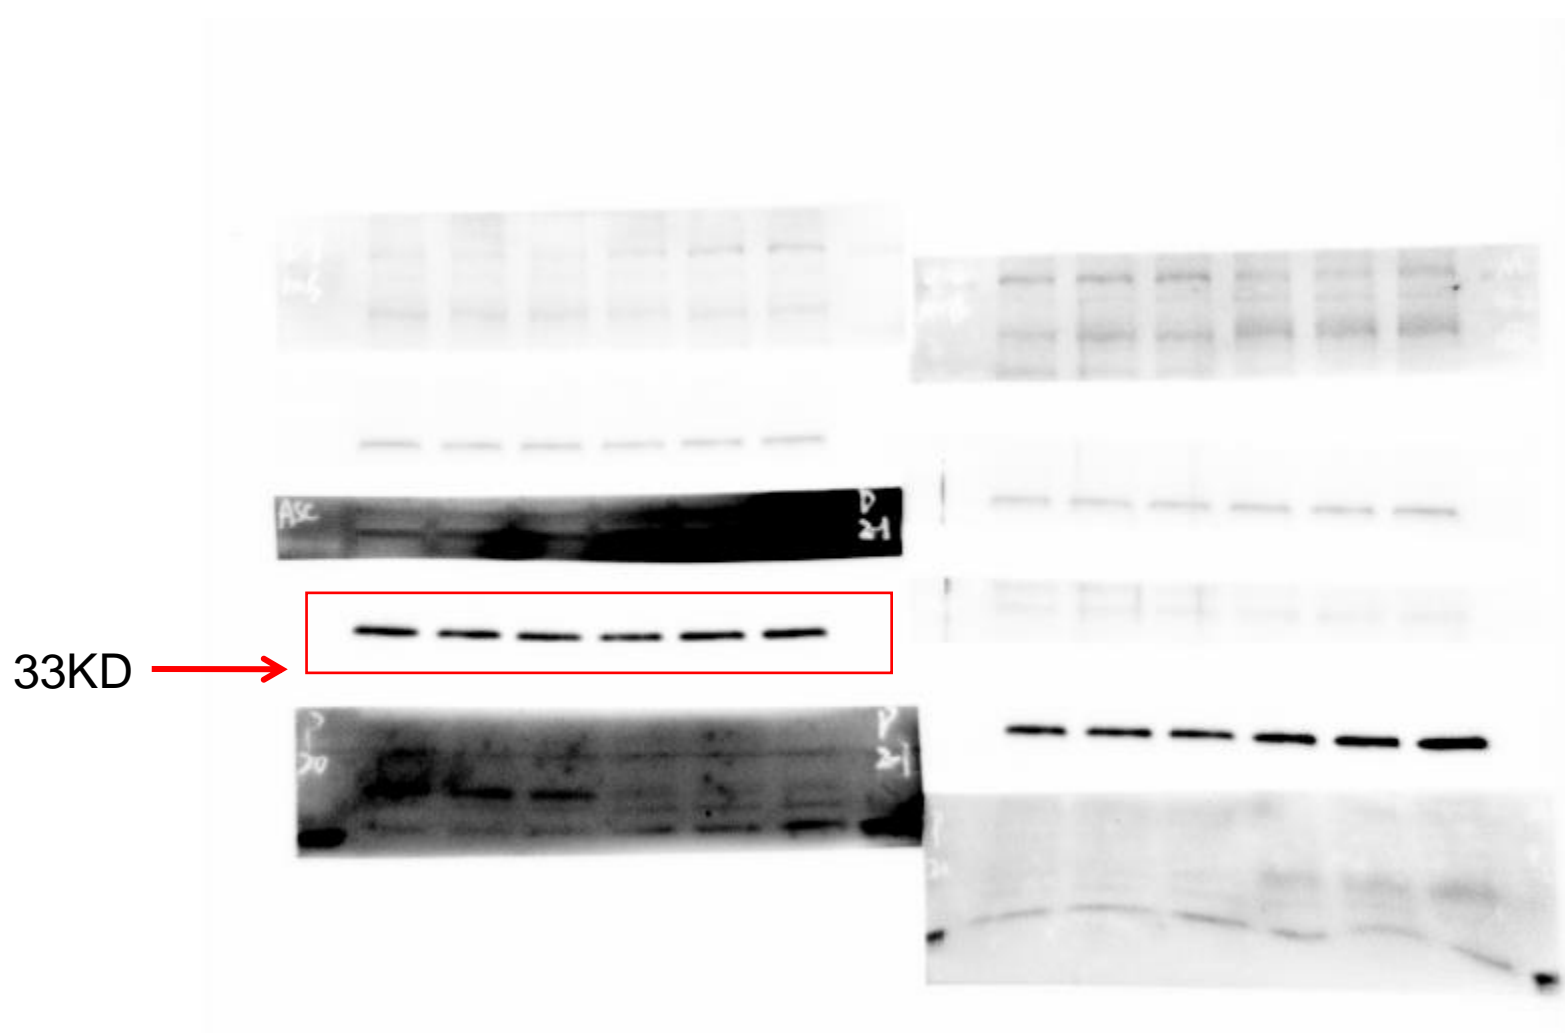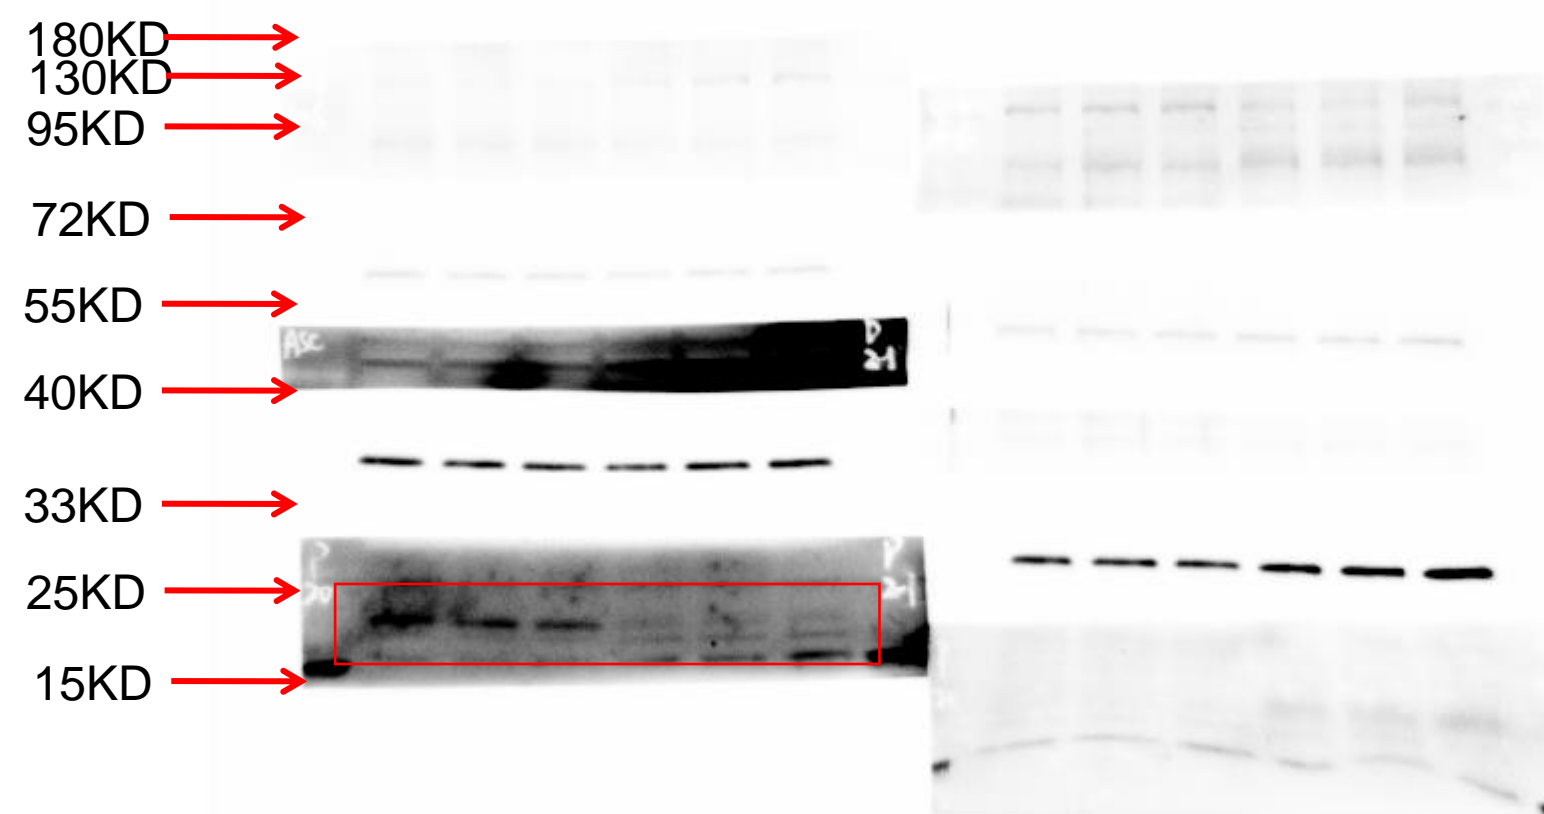

Supplement: mmc1.pdf [file mmc1.pdf]
